# Supplementary material for: Reactions of 1,2-diaza-1,3-butadienes with propargyl alcohol as an approach to novel bi-heterocyclic systems
Source: Royal Society of Chemistry journal article supplement (doi:10.1039/c6ob01595f), 2016-01-01
Supplement: c6ob01595f1.pdf [file c6ob01595f1.pdf]

# Reactions of 1,2-diaza-1,3-butadienes with propargyl alcohol: interesting approaches to novel and fascinating bi-heterocyclic systems

Lucia De Crescentini,\*<sup>a</sup> Francesca Romana Perrulli,<sup>a</sup> Gianfranco Favi<sup>a</sup> Stefania Santeusano,<sup>a</sup>  
Gianluca Giorgi,<sup>b</sup> Orazio A. Attanasi, and Fabio Mantellini\*<sup>a</sup>

<sup>a</sup>*Department of Biomolecular Sciences, Section of Organic Chemistry and Organic Natural Compounds, University of Urbino “Carlo Bo”, Via I Maggetti 24, 61029 Urbino (PU), Italy*

<sup>b</sup>*Department of Chemistry, University of Siena, Via Aldo Moro, 53100 Siena, Italy*

*e-mail: fabio.mantellini@uniurb.it, lucia.decrescentini@uniurb.it*

## SUPPORTING INFORMATION

### Table of Contents

|    |                                                                                                                    |       |
|----|--------------------------------------------------------------------------------------------------------------------|-------|
| 1. | General remarks                                                                                                    | 2     |
| 2. | Experimental procedures and spectral data                                                                          | 2–8   |
|    | General procedure for the synthesis of $\alpha$ -(prop-2-yn-1-yloxy)hydrazones <b>3a–f</b>                         | 2     |
|    | Characterization data of products <b>3a–f</b>                                                                      | 2–4   |
|    | General procedure for the synthesis of 9-alkyl-1-oxa-7,8-diazaspiro[4.4]nona-3,8-dien-6-ones <b>4a–c</b>           | 5     |
|    | Characterization data of products <b>4a–c</b>                                                                      | 5–6   |
|    | General procedure for the synthesis of $\alpha$ -[(1,2,3-triazol-4-yl)methoxy]hydrazones <b>6a–f</b>               | 7     |
|    | Characterization data of products <b>6a–f</b>                                                                      | 7–9   |
|    | General procedure for the synthesis of $\alpha$ -[(1,2,3-triazol-4-yl)methoxy]pyrazolones <b>7a–e</b>              | 10    |
|    | Characterization data of products <b>7a–e</b>                                                                      | 10–11 |
| 3. | <sup>1</sup> H and <sup>13</sup> C NMR spectra of products <b>3a–f</b> , <b>4a–c</b> , <b>6a–f</b> and <b>7a–e</b> | 12–31 |
| 4. | References and notes                                                                                               | 32    |

## Experimental Section

### 1. General Remarks.

All chemicals and solvents were purchased from commercial suppliers and used as received. 1,2-Diaza-1,3-dienes were prepared as reported<sup>1</sup> and used as EE/EZ isomer mixtures. Melting points were determined in open capillary tubes and are uncorrected. FTIR spectra were obtained as Nujol mulls. All <sup>1</sup>H NMR and <sup>13</sup>C NMR spectra were recorded at 400 and 100 MHz, respectively. Proton and carbon spectra were referenced internally to solvent signals, using values of  $\delta = 2.50$  ppm for proton (middle peak) and  $\delta = 39.50$  ppm for carbon (middle peak) in DMSO-d<sub>6</sub> and  $\delta = 7.27$  ppm for proton and  $\delta = 77.00$  ppm for carbon (middle peak) in CDCl<sub>3</sub>. All coupling constants (*J*) are given in Hz. All the NH and OH exchanged with D<sub>2</sub>O. Precoated silica gel plates 0.25 mm were employed for analytical thin layer chromatography. All new compounds showed satisfactory elemental analysis. Mass spectra were recorded in the EI mode (70eV). The nomenclature was generated using ACD/IUPAC Name (version 3.50, 5 Apr. 1998), Advanced Chemistry Development Inc., Toronto, ON (Canada).

### 2. Experimental procedures and spectral data.

#### General procedure for the synthesis of $\alpha$ -(prop-2-yn-1-yloxy)hydrazones **3a–f**, starting from 1,2-diaza-1,3-dienes **1a–f** and propargylic alcohol **2**.

A mixture of 1,2-diaza-1,3-diene **1a–f** as a mixture of E/Z isomers<sup>1</sup> (1 mmol), propargylic alcohol **2** (1 mmol), and DBU (0.01 mmol) was stirred at room temperature in CH<sub>2</sub>Cl<sub>2</sub> (6 mL) for the appropriate time (24.0–72.0 hours), until the disappearance of the reagent **1** (TLC monitoring). The crude mixture was then purified by column chromatography on silica gel to afford the products **3a–f**, that were crystallized from diethyl ether.

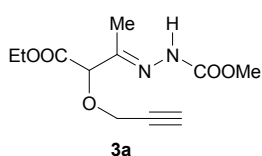

#### Methyl

#### 2-[3-ethoxy-1-methyl-3-oxo-2-(prop-2-yn-1-

#### yloxy)propylidene]hydrazinecarboxylate (**3a**): **3a** was isolated by

column chromatography (acetate/cyclohexane 20:80) in 60% yield. White solid; mp: 115–117 °C; <sup>1</sup>H NMR (400 MHz, CDCl<sub>3</sub>, 25 °C):  $\delta = 1.27$  (t, *J*

= 7.2 Hz, 3H), 1.84 (s, 3H), 2.47 (t, *J*<sub>4</sub> = 2.4 Hz, 1H), 3.84 (s, 3H), 4.22–4.30 (m, 4H), 4.80 (s, 1H), 7.77 (s, 1H); <sup>13</sup>C NMR (100 MHz, CDCl<sub>3</sub>, 25 °C):  $\delta = 11.4$  (q), 13.3 (q), 53.3 (t), 57.4 (q), 61.9 (t), 70.0 (d), 78.6 (s), 81.4 (d), 147.4 (s), 154.6 (s), 168.7 (s); IR (nujol):  $\nu_{\text{max}} = 3292, 3219, 2119, 1734, 1718, 1705$  cm<sup>-1</sup>; MS *m/z* (%): 256 (M<sup>+</sup>) (1), 225 (11), 211 (5), 197 (33), 183 (12), 142 (15), 125 (100); anal. calcd. for C<sub>11</sub>H<sub>16</sub>N<sub>2</sub>O<sub>5</sub> (256.25): C 51.56, H 6.29, N 10.93; found: C 51.78, H 6.32, N 11.11.

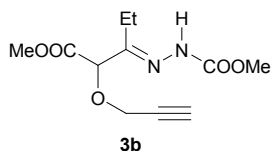

### Methyl

### 2-[1-ethoxy-3-methyl-3-oxo-2-(prop-2-yn-1-

### yloxy)propylidene]hydrazinecarboxylate (3b):

**3b** was isolated by column chromatography (acetate/cyclohexane 20:80) in 61% yield. White solid; mp: 114–116 °C; <sup>1</sup>H NMR (400 MHz, CDCl<sub>3</sub>, 25 °C): δ = 1.05 (t, *J*

= 7.6 Hz, 3H), 2.20–2.42 (m, 2H), 2.46 (t, *J*<sub>4</sub> = 2.4 Hz, 1H), 3.74 (s, 3H), 3.80 (s, 3H), 4.21 and 4.27 (dd, *J*<sub>3</sub> = 15.6 Hz, *J*<sub>4</sub> = 2.4 Hz, 2H), 4.79 (s, 1H), 8.29 (br, 2H); <sup>13</sup>C NMR (100 MHz, CDCl<sub>3</sub>, 25 °C): δ = 9.7 (q), 18.9 (t), 52.4 (q), 53.0 (q), 57.2 (t), 75.7 (d), 78.3 (s), 80.5 (d), 151.0 (s), 154.7 (s), 169.1 (s); IR (nujol): ν<sub>max</sub> = 3510, 3455, 3305, 3265, 2120, 1735, 1710, 1680 cm<sup>-1</sup>; MS *m/z* (%): 256 (M<sup>+</sup>) (1), 225 (22), 210 (11), 197 (30), 142 (11), 125 (100); anal. calcd. for C<sub>11</sub>H<sub>16</sub>N<sub>2</sub>O<sub>5</sub> (256.25): C 51.56, H 6.29, N 10.93; found: C 51.39, H 6.19, N 11.01.

### Methyl

### 2-{1-[2-ethoxy-2-oxo-1-(prop-2-yn-1-

### yloxy)ethyl]butylidene}hydrazinecarboxylate (3c):

**3c** was isolated by column chromatography (acetate/cyclohexane 30:70) in 41% yield. White solid; mp: 119–122 °C; <sup>1</sup>H NMR (400 MHz, CDCl<sub>3</sub>, 25 °C): δ = 0.95 and

0.99 (2t, *J* = 7.6 Hz, 3H), 1.27–1.31 (m, 3H), 1.42–1.72 (m, 2H), 2.15–2.33 (m, 1H), 2.39–2.42 (m, 1H), 2.47 and 2.56 (2t, *J*<sub>4</sub> = 2.4 Hz, 1H), 3.79 and 3.84 (2s, 3H), 4.22–4.32 (m, 4H), 4.80 and 4.92 (2s, 1H), 7.92 and 9.33 (2brs, 1H); <sup>13</sup>C NMR (100 MHz, CDCl<sub>3</sub>, 25 °C): δ = 13.7 (q), 14.0 (q), 14.1 (q), 14.5 (q), 18.6 (t), 20.0 (t), 28.0 (t), 38.3 (t), 57.2 (q), 61.6 (t), 62.4 (t), 75.2 (d), 75.7 (d), 78.4 (s), 80.7 (d), 147.0 (s), 154.3 (s), 167.2 (s), 168.7 (s); IR (nujol): ν<sub>max</sub> = 3275, 3228, 2124, 1734, 1705 cm<sup>-1</sup>; MS *m/z* (%): 284 (M<sup>+</sup>) (1), 239 (12), 225 (18), 211 (35), 125 (18), 109 (100); anal. calcd. for C<sub>13</sub>H<sub>20</sub>N<sub>2</sub>O<sub>5</sub> (284.30): C 54.92, H 7.09, N 9.85; found: C 55.15, H 7.18, N 9.68.

### tert-Butyl

### 2-[3-ethoxy-1-methyl-3-oxo-2-(prop-2-yn-1-

### yloxy)propylidene]hydrazinecarboxylate (3d):

**3d** was isolated by column chromatography (acetate/cyclohexane 20:80) in 77% yield. White solid; mp: 123–125 °C; <sup>1</sup>H NMR (400 MHz, DMSO-*d*<sub>6</sub>, 25 °C): δ = 1.19 (t,

*J* = 7.2 Hz, 3H), 1.45 (s, 9H), 1.76 (s, 3H), 3.54 (t, *J*<sub>4</sub> = 2.4 Hz, 1H), 4.15 (q, *J* = 7.2 Hz, 2H), 4.19–4.20 (m, 2H), 4.59 (s, 1H), 9.82 (s, 1H); <sup>13</sup>C NMR (100 MHz, DMSO-*d*<sub>6</sub>, 25 °C): δ = 13.1 (q), 14.7 (q), 28.7 (q), 57.1 (t), 61.6 (t), 78.7 (d), 79.9 (s), 80.3 (s), 81.6 (d), 147.3 (s), 153.5 (s), 169.0 (s); IR (nujol): ν<sub>max</sub> = 3273, 3238, 2136, 1741, 1707 cm<sup>-1</sup>; MS *m/z* (%): 298 (M<sup>+</sup>) (1), 225 (13), 188 (3), 169 (23), 142 (45), 125 (100); anal. calcd. for C<sub>14</sub>H<sub>22</sub>N<sub>2</sub>O<sub>5</sub> (298.33): C 56.36, H 7.43, N 9.39; found: C 56.58, H 7.49, N 9.52.

### tert-Butyl

### 2-[1-ethyl-3-methoxy-3-oxo-2-(prop-2-yn-1-

### yloxy)propylidene]hydrazinecarboxylate (3e):

**3e** was isolated by column chromatography (acetate/cyclohexane 20:80) in 80% yield. White

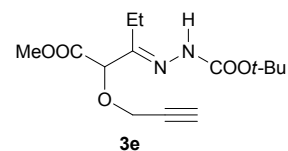

solid; mp: 114–115 °C; <sup>1</sup>H NMR (400 MHz, DMSO<sub>d6</sub>, 25 °C): δ = 0.89 (t, *J* = 7.6 Hz, 3H), 1.43 (s, 9H), 2.19–2.40 (m, 2H), 3.52 (t, *J*<sub>4</sub> = 2.4 Hz, 1H), 3.67 (s, 3H), 4.15 and 4.23 (dd, *J*<sub>2</sub> = 16.0 Hz, *J*<sub>4</sub> = 2.4 Hz, AB system, 2H), 4.63 (s, 1H), 9.89 (s, 1H); <sup>13</sup>C NMR (100 MHz, DMSO<sub>d6</sub>, 25 °C): δ = 9.5 (q), 19.2 (t), 28.0 (q), 51.8 (q), 56.6 (t), 78.0 (d), 79.2 (s), 79.6 (s), 80.1 (d), 150.1 (s), 152.7 (s), 169.1 (s); IR (nujol): ν<sub>max</sub> = 3256, 3218, 2132, 1756, 1747, 1731, 1711 cm<sup>-1</sup>; MS *m/z* (%): 298 (M<sup>+</sup>) (1), 239 (7), 225 (16), 188 (21), 154 (36), 139 (100), 128 (54), 112 (82); anal. calcd. for C<sub>14</sub>H<sub>22</sub>N<sub>2</sub>O<sub>5</sub> (298.33): C 56.36, H 7.43, N 9.39; found: C 56.03, H 7.31, N 9.49.

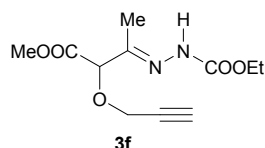

### Ethyl

### 2-[3-methoxy-3-oxo-2-(prop-2-yn-1-

**yloxy)propylidene]hydrazinecarboxylate (3f):** 3f was isolated by column chromatography (acetate/cyclohexane 20:80) in 60% yield. White solid; mp: 118–120 °C; <sup>1</sup>H NMR (400 MHz, CDCl<sub>3</sub>, 25 °C): δ = 1.30 (t, *J*

= 7.2 Hz, 3H), 1.84 (s, 3H), 2.46 (t, *J*<sub>4</sub> = 2.4 Hz, 1H), 3.75 (s, 3H), 4.20–4.30 (m, 4H), 4.82 (s, 1H), 7.83 (s, 1H); <sup>13</sup>C NMR (100 MHz, CDCl<sub>3</sub>, 25 °C): δ = 11.5 (q), 15.0 (q), 53.0 (t), 57.8 (q), 62.6 (t), 76.2 (d), 78.8 (s), 81.6 (d), 147.2 (s), 154.5 (s), 169.5 (s); IR (nujol): ν<sub>max</sub> = 3266, 3217, 2129, 1755, 1748, 1707 cm<sup>-1</sup>; MS *m/z* (%): 256 (M<sup>+</sup>) (1), 202 (12), 197 (52), 168 (27), 151 (7), 129 (74), 101 (100); anal. calcd. for C<sub>11</sub>H<sub>16</sub>N<sub>2</sub>O<sub>5</sub> (256.26): C 51.56, H 6.29, N 10.93; found: C 51.78, H 6.51, N 10.76.

**General procedure for the synthesis of 9-alkyl-1-oxa-7,8-diazaspiro[4.4]nona-3,8-dien-6-ones 4a–c, starting from of  $\alpha$ -(prop-2-yn-1-yloxy)hydrazones 3a–c.**

To magnetically stirred solution of  $\alpha$ -(prop-2-yn-1-yloxy)hydrazones **3a–c** (1 mmol) in MeOH (6 mL), four equivalents of  $K_2CO_3$  were added. The mixture was stand in these conditions for 1.0–1.5 hours, until the disappearance of the **3** (TLC monitoring). The crude mixture was purified by column chromatography on silica gel to afford the products **4**, that were crystallized from diethyl ether-light petroleum (bp 40–60 °C).

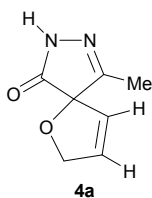

**9-Methyl-1-oxa-7,8-diazaspiro[4.4]nona-3,8-dien-6-one (4a):** **4a** was isolated by column chromatography (acetate/cyclohexane 20:80) in 73% yield. White solid; mp: 125–128 °C;  $^1H$  NMR (400 MHz,  $CDCl_3$ , 25 °C):  $\delta$  = 1.95 (s, 3H), 4.88–4.93 and 5.04–5.09 (2m, 2H), 5.54–5.57 (m, 1H), 6.40–6.42 (m, 1H) 8.75 (s, 1H);  $^{13}C$  NMR (100 MHz,  $CDCl_3$ , 25 °C):  $\delta$  = 12.9 (q), 78.1 (t), 91.6 (s), 123.4 (d), 133.1 (d), 160.1 (s), 175.4 (s); IR (nujol):  $\nu_{max}$  = 3348, 3165, 1718, 1704  $cm^{-1}$ ; MS  $m/z$  (%): 152 ( $M^+$ ) (71), 124 (9), 110 (9), 98 (18), 81 (23), 68 (100), 53 (16), 39 (96); anal. calcd. for  $C_7H_8N_2O_2$  (152.15): C 55.26, H 5.30, N 18.41; found: C 55.42, H 5.41, N 18.29.

**X-ray Crystallography**

A single crystal of **4a** was submitted to X-ray data collections by using a Xcalibur, Sapphire3 (Oxford Diffraction Ltd., U.K.) four-circle diffractometer with graphite monochromated Mo- $K\alpha$  radiation ( $\lambda=0.71073\text{\AA}$ ). The structure was solved by direct methods implemented in SHELXS-2013 program. The refinement was carried out by full-matrix anisotropic least-squares on  $F^2$  for all reflections for non-H atoms by using the SHELXL-2013 program.

$C_7H_8N_2O_2$ ,  $M = 152.15$ , monoclinic,  $a = 6.4408(8)$ ,  $b = 16.415(2)$ ,  $c = 6.8820(7)$   $\text{\AA}$ ,  $\beta = 93.99(1)^\circ$ ,  $U = 725.85(15)\text{\AA}^3$ ,  $T = 293$  K, space group P21/n (no. 14),  $Z = 4$ , 3007 reflections measured, 1675 unique ( $I > 2\sigma(I)$ )  $R_{int} = 0.021$ ). The final  $wR_2$  was 0.113 (all data).

CCDC 1474432 contains the supplementary crystallographic data for compound **4a**. These data can be obtained free of charge from the Cambridge Crystallographic Data Centre via [www.ccdc.cam.ac.uk/data\\_request/cif](http://www.ccdc.cam.ac.uk/data_request/cif).

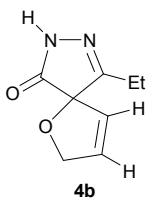

**9-Ethyl-1-oxa-7,8-diazaspiro[4.4]nona-3,8-dien-6-one (4b):** **4b** was isolated by column chromatography (acetate/cyclohexane 20:80) in 68% yield. White solid; mp: 123–125 °C;  $^1H$  NMR (400 MHz,  $CDCl_3$ , 25 °C):  $\delta$  = 1.61 (t,  $J = 7.2$  Hz, 3H), 2.21–2.42 (m, 2H), 4.88–4.92 and 5.05–5.09 (2m, 2H), 5.56–5.59 (m, 1H), 6.38–6.40 (m, 1H), 8.55 (br, 1H);  $^{13}C$  NMR (100 MHz,  $CDCl_3$ , 25 °C):  $\delta$  = 9.8 (q), 21.3 (t), 78.4 (t), 91.8 (s), 124.1 (d), 133.1 (d), 164.4 (s), 175.7 (s); IR (nujol):  $\nu_{max}$  = 3163, 3084, 1720, 1684  $cm^{-1}$ ; MS  $m/z$

(%): 166 ( $M^+$ ) (1), 137 (1), 111 (2), 97 (3), 69 (5), 28 (100); anal. calcd. for  $C_8H_{10}N_2O_2$  (166.17): C 57.82, H 6.07, N 16.86; found: C 57.64, H 5.95, N 16.99.

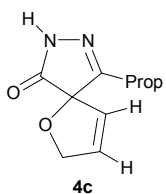

**9-Propyl-1-oxa-7,8-diazaspiro[4.4]nona-3,8-dien-6-one (4c):** **4c** was isolated by column chromatography (acetate/cyclohexane 20:80) in 67% yield. White solid; mp: 101–103 °C;  $^1H$  NMR (400 MHz,  $CDCl_3$ , 25 °C):  $\delta$  = 0.96 (t,  $J$  = 7.2 Hz, 3H), 2.17–2.34 (m, 2H), 4.88–4.93 and 5.05–5.10 (2m, 2H), 5.56–5.59 (m, 1H), 6.39–6.41 (m, 1H), 8.23 (s, 1H);  $^{13}C$  NMR (100 MHz,  $CDCl_3$ , 25 °C):  $\delta$  = 14.1 (q), 19.1 (t), 30.0 (t), 78.4 (t), 91.7 (s), 124.1 (d), 133.1 (d), 163.3 (s), 175.5 (s); IR (nujol):  $\nu_{max}$  = 3171, 3093, 1725, 1690  $cm^{-1}$ ; MS  $m/z$  (%): 180 ( $M^+$ ) (23), 166 (22), 149 (56), 137 (39), 123 (61), 111 (100); anal. calcd. for  $C_9H_{11}N_2O_2$  (180.20): C 59.99, H 6.71, N 15.55; found: C 60.22, H 6.80, N 15.68.

**General procedure for the synthesis of  $\alpha$ -[(1,2,3-triazol-4-yl)methoxy]hydrazones **6a–f**, starting from  $\alpha$ -(prop-2-yn-1-yloxy)hydrazones **3a,d–f** and benzyl azides **5a,b**.**

To a solution of  $\alpha$ -(prop-2-yn-1-yloxy)hydrazones **3a,d–f** (1.0 mmol) and benzyl azides **5a,b** (1.1 mmol) in CH<sub>2</sub>Cl<sub>2</sub> (1 mL)–H<sub>2</sub>O (1 mL), Cu(OAc)<sub>2</sub>·H<sub>2</sub>O (0.55 mmol) and sodium ascorbate (0.15 mmol) were added. The reaction was allowed under magnetic stirring at room temperature for the appropriate time (2.0–12.0 h), until the disappearance of the hydrazone **3** (monitored by TLC). After the adding of further amount of CH<sub>2</sub>Cl<sub>2</sub> (4 mL), the crude was washed with aqueous saturated solution of NH<sub>4</sub>Cl (2x10ml) and then with H<sub>2</sub>O (2x10ml) and dried over anhydrous Na<sub>2</sub>SO<sub>4</sub>. The organic phase was then filtered and concentrated under reduced pressure. The products **6a–f** were purified by column chromatography on silica gel (elution mixture: ethyl acetate/cyclohexane).

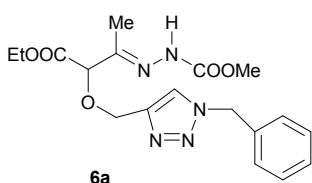

**Methyl 2-{2-[(1-benzyl-1H-1,2,3-triazol-4-yl)methoxy]-3-ethoxy-1-methyl-3-oxopropylidene}hydrazinecarboxylate (**6a**):** **6a** was isolated by column chromatography (acetate/cyclohexane 20:80) in 62% yield. White solid; mp: 103–105 °C; <sup>1</sup>H NMR (400 MHz, CDCl<sub>3</sub>,

25 °C):  $\delta$  = 1.17 (t,  $J$  = 7.2 Hz, 3H), 1.78 (s, 3H), 3.74 (s, 3H), 4.13 (q,  $J$  = 7.2 Hz, 2H), 4.58–4.66 (m, 3H), 5.44 (s, 2H), 7.20–7.22 (m, 2H<sub>ar</sub>), 7.29–7.32 (m, 3H<sub>ar</sub>), 7.51 (s, 1H<sub>ar</sub>), 8.27 (s, 1H); <sup>13</sup>C NMR (100 MHz, CDCl<sub>3</sub>, 25 °C):  $\delta$  = 11.5 (q), 14.4 (q), 53.3 (q), 54.4 (t), 61.9 (t), 63.6 (t), 82.2 (d), 123.5 (d), 128.5 (d), 129.0 (d), 129.2 (d), 129.4 (d), 134.8 (s), 144.5 (s), 147.9 (s), 154.8 (s), 168.9 (s); IR (nujol):  $\nu_{\max}$  = 3245, 3140, 1720, 1705 cm<sup>-1</sup>; MS  $m/z$  (%): 389 (M<sup>+</sup>) (1), 344 (1), 315 (11), 188 (4), 173 (100), 156 (13); anal. calcd. for C<sub>18</sub>H<sub>23</sub>N<sub>5</sub>O<sub>5</sub> (389.40): C 55.52, H 5.95, N 17.98; found: C 55.39, H 5.88, N 18.21.

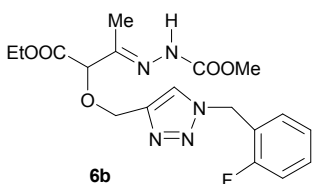

**Methyl 2-(3-ethoxy-2-{[1-(2-fluorobenzyl)-1H-1,2,3-triazol-4-yl]methoxy}-1-methyl-3-oxopropylidene)hydrazinecarboxylate (**6b**):**

**6b** was isolated by column chromatography (acetate/cyclohexane 20:80) in 79% yield. White solid; mp: 99–101 °C; <sup>1</sup>H NMR (400 MHz, CDCl<sub>3</sub>, 25 °C):  $\delta$  = 1.23 (t,  $J$  = 7.2 Hz, 3H), 1.82 (s, 3H), 3.83 (s, 3H), 4.20 (q,  $J$  = 7.2 Hz, 2H), 4.64–4.73 (m, 3H), 5.56 (s, 2H), 7.04–7.16 (m, 2H<sub>ar</sub>), 7.23–7.41 (m, 2H<sub>ar</sub>), 7.62 (s, 1H<sub>ar</sub>), 7.88 (brs, 1H); <sup>13</sup>C NMR (100 MHz, CDCl<sub>3</sub>, 25 °C):  $\delta$  = 11.4 (q), 14.6 (q), 48.1 (t), 53.6 (q), 62.1 (t), 63.8 (t), 82.4 (d), 116.2 (d), 116.4 (d), 122.2 (s), 123.7 (d), 125.3 (d), 131.2 (d), 131.4 (d), 131.7 (s), 144.8 (s), 147.9 (s), 154.9 (s), 159.8 (s), 162.2 (s), 169.1 (s); IR (nujol):  $\nu_{\max}$  = 3247, 3145, 1725, 1702 cm<sup>-1</sup>; MS  $m/z$  (%): 407 (M<sup>+</sup>) (2), 333 (8), 246 (2), 191 (72), 162 (27), 109 (100); anal. calcd. for C<sub>18</sub>H<sub>22</sub>FN<sub>5</sub>O<sub>5</sub> (407.40): C 53.07, H 5.44, N 17.19; found: C 53.35, H 5.56, N 17.08.

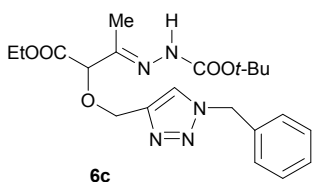

**tert-Butyl 2-{2-[(1-benzyl-1H-1,2,3-triazol-4-yl)methoxy]-3-ethoxy-1-methyl-3-oxopropylidene}hydrazinecarboxylate (**6c**):** **6c** was

isolated by column chromatography (acetate/cyclohexane 20:80) in 78% yield. White solid; mp: 120–121 °C;  $^1\text{H}$  NMR (400 MHz,  $\text{CDCl}_3$ , 25 °C):  $\delta$  = 1.21 (t,  $J$  = 7.2 Hz, 3H), 1.46 (s, 9H), 1.76 (s, 3H), 4.14 (q,  $J$  = 7.2 Hz, 2H), 4.63 (s, 2H), 4.64 (s, 1H), 5.45 (s, 2H), 7.23–7.26 (m, 2H<sub>ar</sub>), 7.30–7.32 (m, 3H<sub>ar</sub>), 7.54 (s, 1H<sub>ar</sub>), 7.77 (s, 1H);  $^{13}\text{C}$  NMR (100 MHz,  $\text{CDCl}_3$ , 25 °C):  $\delta$  = 11.3 (q), 14.5 (q), 28.6 (q), 54.5 (t), 61.9 (t), 63.6 (t), 81.8 (s), 82.4 (d), 123.6 (d), 128.5 (d), 129.1 (d), 129.2 (d), 129.4 (d), 134.9 (s), 144.6 (s), 146.7 (s), 152.7 (s), 169.1 (s); IR (nujol):  $\nu_{\text{max}}$  = 3247, 3145, 1720, 1701  $\text{cm}^{-1}$ ; MS  $m/z$  (%): 431 ( $\text{M}^+$ ) (1), 410 (5), 358 (4), 303 (6), 188 (5), 173 (100), 144 (48); anal. calcd. for  $\text{C}_{21}\text{H}_{29}\text{N}_5\text{O}_5$  (431.48): C 58.45, H 6.77, N 16.23; found: C 58.68, H 6.89, N 16.09.

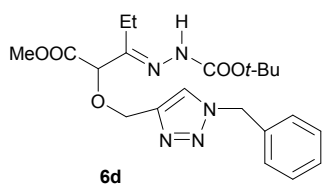

**tert-Butyl 2-{2-[(1-benzyl-1H-1,2,3-triazol-4-yl)methoxy]-1-ethyl-3-methoxy-3-oxopropylidene}hydrazinecarboxylate (6d):** 6d was isolated by column chromatography (acetate/cyclohexane 20:80) in 69% yield. White solid; mp: 118–119 °C;  $^1\text{H}$  NMR (400 MHz,  $\text{CDCl}_3$ ,

25 °C):  $\delta$  = 1.03–1.07 (m, 3H), 1.47 and 1.50 (2s, 9H), 2.14–2.48 (m, 2H), 3.72 and 3.74 (2s, 3H), 4.68–4.79 (m, 3H), 5.51–5.23 (m, 2H), 7.26–7.29 (m, 2H<sub>ar</sub>), 7.34–7.38 (m, 3H<sub>ar</sub>), 7.50 and 7.59 (2s, 1H<sub>ar</sub>), 7.70 and 9.27 (2brs, 1H);  $^{13}\text{C}$  NMR (100 MHz,  $\text{CDCl}_3$ , 25 °C):  $\delta$  = 9.9 (q), 11.2 (q), 19.4 (t), 28.7 (q), 52.8 (q), 53.3 (q), 54.7 (t), 54.8 (t), 63.5 (t), 63.8 (t), 76.7 (d), 81.4 (s), 82.0 (d), 123.5 (d), 123.7 (d), 128.6 (d), 128.7 (d), 129.2 (d), 129.3 (d), 129.4 (d), 129.6 (d), 129.7 (d), 134.7 (s), 135.0 (s), 144.2 (s), 144.7 (s), 153.4 (s), 165.5 (s), 170.0 (s); IR (nujol):  $\nu_{\text{max}}$  = 3234, 3135, 1754, 1704  $\text{cm}^{-1}$ ; MS  $m/z$  (%): 431 ( $\text{M}^+$ ) (1), 315 (18), 242 (6), 229 (6), 188 (9), 173 (100), 144 (43); anal. calcd. for  $\text{C}_{21}\text{H}_{29}\text{N}_5\text{O}_5$  (431.48): C 58.45, H 6.77, N 16.23; found: C 58.23, H 6.65, N 16.51.

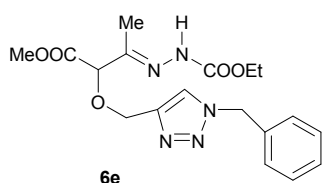

**Methyl 2-{2-[(1-benzyl-1H-1,2,3-triazol-4-yl)methoxy]-3-ethoxy-1-methyl-3-oxopropylidene}hydrazinecarboxylate (6e):** 6e was isolated by column chromatography (acetate/cyclohexane 20:80) in 81% yield. Colourless oil;  $^1\text{H}$  NMR (400 MHz,  $\text{CDCl}_3$ , 25 °C):  $\delta$  =

1.26 (t,  $J$  = 7.2 Hz, 3H), 1.79 (s, 3H), 3.68 (s, 3H), 4.22 (q,  $J$  = 7.2 Hz, 2H), 4.64–4.68 (m, 3H), 5.47 (s, 2H), 7.23–7.25 (m, 2H<sub>ar</sub>), 7.26–7.33 (m, 3H<sub>ar</sub>), 7.53 (s, 1H<sub>ar</sub>), 8.06 (s, 1H);  $^{13}\text{C}$  NMR (100 MHz,  $\text{CDCl}_3$ , 25 °C):  $\delta$  = 11.5 (q), 14.9 (q), 52.8 (q), 54.5 (t), 62.5 (t), 63.6 (t), 82.2 (d), 123.6 (d), 128.5 (d), 129.1 (d), 129.5 (d), 129.9 (d), 134.9 (s), 144.5 (s), 147.6 (s), 154.4 (s), 169.6 (s); IR (nujol):  $\nu_{\text{max}}$  = 3253, 3145, 1743  $\text{cm}^{-1}$ ; MS  $m/z$  (%): 389 ( $\text{M}^+$ ) (1), 301 (18), 228 (3), 202 (4), 188 (4), 173 (100), 144 (33); anal. calcd. for  $\text{C}_{18}\text{H}_{23}\text{N}_5\text{O}_5$  (389.40): C 55.52, H 5.95, N 17.98; found: C 55.80, H 6.03, N 17.81.

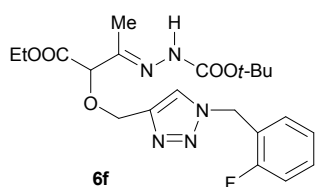

**tert-Butyl 2-(3-ethoxy-2-{[1-(2-fluorobenzyl)-1H-1,2,3-triazol-4-yl]methoxy}-1-methyl-3-oxopropylidene)hydrazinecarboxylate (6f):** 6f was isolated by column chromatography (acetate/cyclohexane 20:80)



in 81% yield. White solid; mp: 95–97 °C;  $^1\text{H}$  NMR (400 MHz,  $\text{CDCl}_3$ , 25 °C):  $\delta$  = 1.24 (t,  $J$  = 7.2 Hz, 3H), 1.50 (s, 9H), 1.79 (s, 3H), 4.19 (q,  $J$  = 7.2 Hz, 2H), 4.64–4.72 (m, 3H), 5.56 (s, 2H), 7.08–7.16 (m, 2H<sub>ar</sub>), 7.26–7.35 (m, 2H<sub>ar</sub>), 7.62 (s, 1H<sub>ar</sub>), 7.66 (brs, 1H);  $^{13}\text{C}$  NMR (100 MHz,  $\text{CDCl}_3$ , 25 °C):  $\delta$  = 11.4 (q), 14.6 (q), 28.7 (q), 48.1 (t), 62.1 (t), 63.7 (t), 82.1 (s), 82.5 (d), 116.2 (d), 116.4 (d), 122.3 (s), 123.8 (d), 125.3 (d), 131.1 (d), 131.3 (d), 131.4 (s), 144.8 (s), 146.7 (s), 152.7 (s), 160.0 (s), 162.2 (s), 169.2 (s); IR (nujol):  $\nu_{\text{max}}$  = 3330, 3245, 1749, 1725, 1701  $\text{cm}^{-1}$ ; MS  $m/z$  (%): 449 ( $\text{M}^+$ ) (1), 339 (2), 303 (4), 207 (4), 191 (13), 162 (8), 149 (6), 122 (9), 109 (100); anal. calcd. for  $\text{C}_{21}\text{H}_{28}\text{FN}_5\text{O}_5$  (449.47): C 56.12, H 6.28, N 15.58; found: C 56.35, H 6.37, N 15.40.

**General procedure for the synthesis of  $\alpha$ -[(1,2,3-triazol-4-yl)methoxy]pyrazolones 7a–e, starting from  $\alpha$ -[(1,2,3-triazol-4-yl)methoxy]hydrazones 6a–f.**

To magnetically stirred solution of  $\alpha$ -[(1,2,3-triazol-4-yl)methoxy]hydrazones 6a–f (1 mmol) in MeOH (6 mL), four equivalents of  $K_2CO_3$  were added. The mixture was stand in these conditions for 0.3–0.5 hours, until the disappearance of the 6 (TLC monitoring). The crude mixture was purified by column chromatography on silica gel to afford the products 7, that were crystallized from diethyl ether-light petroleum (bp 40–60 °C).

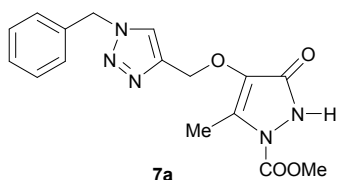

**Methyl 4-[(1-benzyl-1H-1,2,3-triazol-4-yl)methoxy]-3-methyl-5-oxo-2,5-dihydro-1H-pyrazole-1-carboxylate (7a):** 7a was isolated by column chromatography (acetate/methanol 90:10) in 83% yield.

White solid; mp: 130–132 °C;  $^1H$  NMR (400 MHz,  $DMSO_{d6}$ , 25 °C):

$\delta$  = 1.99 (s, 3H), 3.83 (s, 3H), 4.98 (s, 2H), 5.60 (s, 2H), 7.24–7.38 (m, 5H<sub>ar</sub>), 8.18 (s, 1H<sub>ar</sub>), 11.21 (brs, 1H);  $^{13}C$  NMR (100 MHz,  $DMSO_{d6}$ , 25 °C):  $\delta$  = 11.1 (q), 53.2 (t), 54.2 (q), 65.6 (t), 125.4 (d), 128.2 (d), 128.5 (d), 129.1 (d), 130.4 (s), 133.4 (s), 136.6 (s), 143.3 (s), 150.8 (s), 157.1 (s); IR (nujol):  $\nu_{max}$  = 3201, 3134, 3092, 2982, 1737, 1707, 1609  $cm^{-1}$ ; MS  $m/z$  (%): 343 ( $M^+$ ) (7), 285 (3), 173 (84), 144 (100); anal. calcd. for  $C_{16}H_{17}N_5O_4$  (343.33): C 55.97, H 4.99, N 20.40; found: C 55.75, H 4.78, N 20.29.

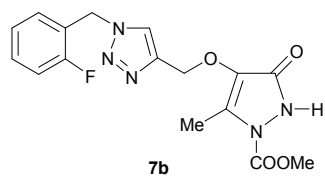

**Methyl 4-[[1-(2-fluorobenzyl)-1H-1,2,3-triazol-4-yl]methoxy]-3-methyl-5-oxo-2,5-dihydro-1H-pyrazole-1-carboxylate (7b):** 7b was isolated by column chromatography (acetate/methanol 90:10) in 86% yield. White solid; mp: 126–129 °C;  $^1H$  NMR (400 MHz,  $DMSO_{d6}$ , 25

°C):  $\delta$  = 1.73 (s, 3H), 3.85 (s, 3H), 4.94 (s, 2H), 5.66 (s, 2H), 7.19–7.30 (m, 3H<sub>ar</sub>), 7.39–7.45 (m, 1H<sub>ar</sub>), 8.20 (s, 1H<sub>ar</sub>), 10.80 (brs, 1H);  $^{13}C$  NMR (100 MHz,  $DMSO_{d6}$ , 25 °C):  $\delta$  = 9.4 (q), 46.8 (t), 53.7 (q), 64.3 (t), 115.5 (d), 115.7 (d), 122.8 (s), 123.0 (s), 124.8 (d), 125.1 (d), 130.5 (d), 130.7 (d), 143.1 (s), 144.7 (s), 148.7 (s), 158.7 (s), 161.2 (s); IR (nujol):  $\nu_{max}$  = 3202, 3133, 3095, 2983, 1737, 1710, 1611  $cm^{-1}$ ; MS  $m/z$  (%): 361 ( $M^+$ ) (1), 317 (3), 191 (15), 162 (19), 109 (100); anal. calcd. for  $C_{16}H_{16}FN_5O_4$  (361.32): C 53.18, H 4.46, N 19.38; found: C 53.35, H 4.25, N 19.20.

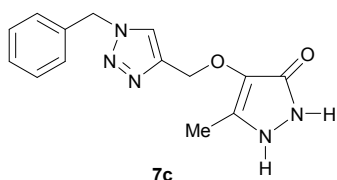

**4-[(1-Benzyl-1H-1,2,3-triazol-4-yl)methoxy]-5-methyl-1,2-dihydro-3H-pyrazol-3-one (7c):** 7c was isolated by column chromatography (acetate/methanol 80:20) in 62% yield from 6c and 60% yield from 6e.

Pale pink solid; mp: 136–138 °C;  $^1H$  NMR (400 MHz,  $DMSO_{d6}$ , 25

°C):  $\delta$  = 1.74 (s, 3H), 4.83 (s, 2H), 5.57 (s, 2H), 7.25–7.35 (m, 5H<sub>ar</sub>), 8.11 (s, 1H<sub>ar</sub>), 10.27 (brs, 2H);  $^{13}C$  NMR (100 MHz,  $DMSO_{d6}$ , 25 °C):  $\delta$  = 8.5 (q), 52.7 (t), 65.7 (t), 125.1 (d), 125.2 (d), 128.5 (d), 128.7 (d), 129.4 (d), 130.1 (s), 136.8 (s), 144.5 (s), 153.2 (s); IR (nujol):  $\nu_{max}$  = 3204, 3134, 3090,

2981, 1738, 1708, 1610  $\text{cm}^{-1}$ ; MS  $m/z$  (%): 285 ( $\text{M}^+$ ) (1), 173 (16), 144 (4), 91 (100); anal. calcd. for  $\text{C}_{14}\text{H}_{15}\text{N}_5\text{O}_2$  (285.30): C 58.94, H 5.30, N 24.55; found: C 59.21, H 5.18, N 24.67.

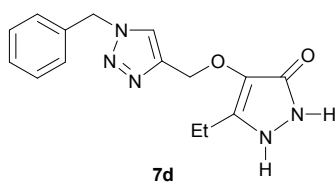

**4-[(1-Benzyl-1H-1,2,3-triazol-4-yl)methoxy]-5-ethyl-1,2-dihydro-3H-pyrazol-3-one (7d):** 7d was isolated by column chromatography

(acetate/methanol 80:20) in 63% yield. Red oil;  $^1\text{H}$  NMR (400 MHz,  $\text{DMSO}_{d6}$ , 25  $^\circ\text{C}$ ):  $\delta$  = 1.24–1.62 (m, 5H), 4.48 (s, 2H), 5.56 (s, 2H),

7.22–7.41 (m, 5 $\text{H}_{\text{ar}}$ ), 8.02 (s, 1 $\text{H}_{\text{ar}}$ ), 11.41 (brs, 2H);  $^{13}\text{C}$  NMR (100 MHz,  $\text{DMSO}_{d6}$ , 25  $^\circ\text{C}$ ):  $\delta$  = 12.4 (q), 30.0 (t), 53.0 (t), 123.3 (d), 128.2 (d), 128.4 (d), 128.6 (d), 129.1 (d), 129.2 (d), 136.7 (s), 143.4 (s), 148.7 (s), 153.4 (s); IR (nujol):  $\nu_{\text{max}}$  = 3210, 3142, 3092, 2981, 1741, 1710, 1615  $\text{cm}^{-1}$ ; MS  $m/z$  (%): 299 ( $\text{M}^+$ ) (1), 209 (18), 110 (9), 91 (100); anal. calcd. for  $\text{C}_{15}\text{H}_{17}\text{N}_5\text{O}_2$  (299.32): C 60.19, H 5.72, N 23.40; found: C 60.32, H 5.85, N 23.28.

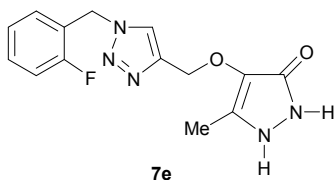

**4-[[1-(2-Fluorobenzyl)-1H-1,2,3-triazol-4-yl]methoxy]-5-methyl-1,2-dihydro-3H-pyrazole-3-one (7e):** 7e was isolated by column

chromatography (acetate/methanol 80:00) in 67% yield. Red oil;  $^1\text{H}$  NMR (400 MHz,  $\text{DMSO}_{d6}$ , 25  $^\circ\text{C}$ ):  $\delta$  = 1.93 (s, 3H), 4.83 (s, 2H), 5.64

(s, 2H), 7.18–7.40 (m, 4 $\text{H}_{\text{ar}}$ ), 8.10 (s, 1 $\text{H}_{\text{ar}}$ ), 10.52 (brs, 2H);  $^{13}\text{C}$  NMR (100 MHz,  $\text{DMSO}_{d6}$ , 25  $^\circ\text{C}$ ):  $\delta$  = 8.5 (q), 46.8 (t), 65.7 (t), 116.2 (d), 116.4 (d), 123.6 (s), 125.0 (s), 125.4 (d), 125.5 (d), 130.1 (s), 131.3 (d), 131.4 (d), 144.5 (s), 153.2 (s), 159.5 (s), 161.9 (s); IR (nujol):  $\nu_{\text{max}}$  = 3208, 3132, 3093, 2980, 1735, 1710, 1611  $\text{cm}^{-1}$ ; MS  $m/z$  (%): 303 ( $\text{M}^+$ ) (2), 281 (3), 207 (21), 191 (14), 162 (11), 109 (100); anal. calcd. for  $\text{C}_{14}\text{H}_{14}\text{FN}_5\text{O}_2$  (303.29): C 55.44, H 4.65, N 23.09; found: C 55.22, H 4.45, N 23.21.

### 3. $^1\text{H}$ and $^{13}\text{C}$ NMR spectra of products.

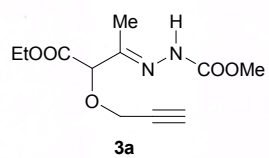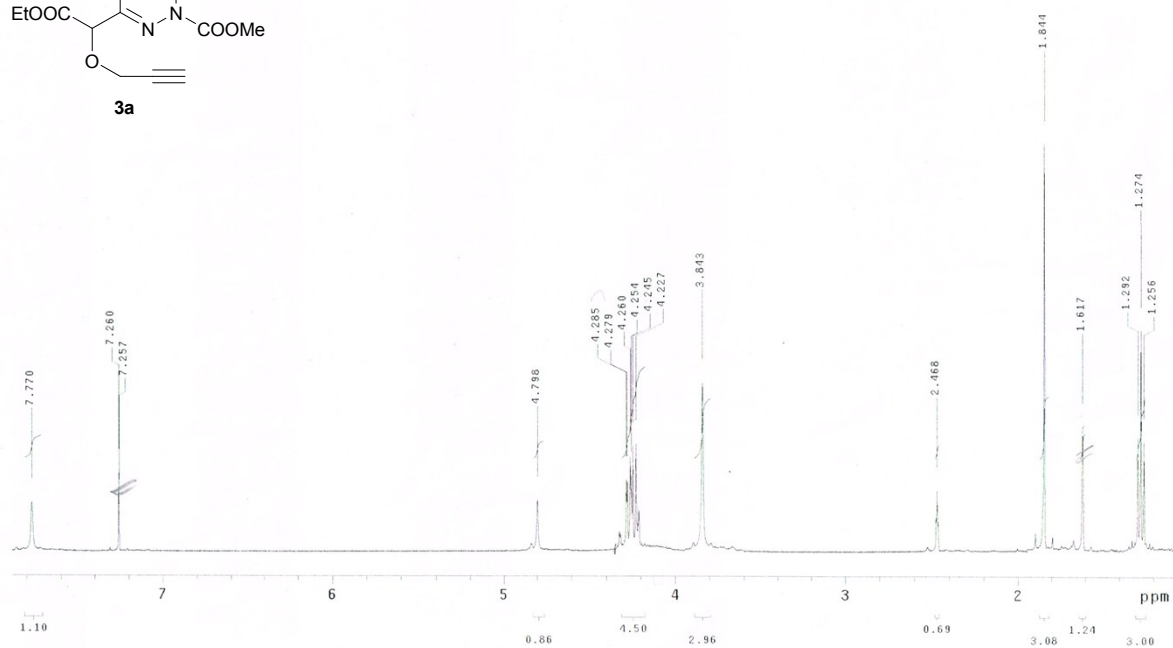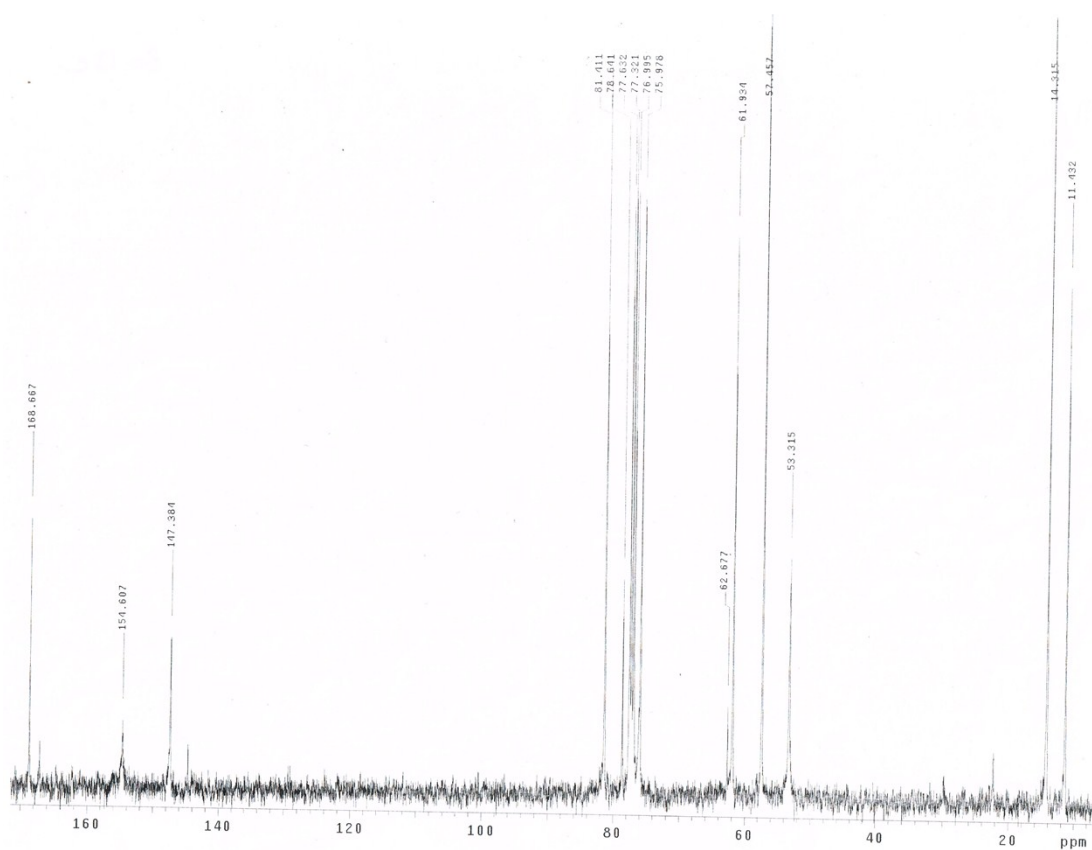

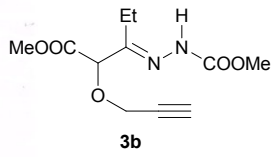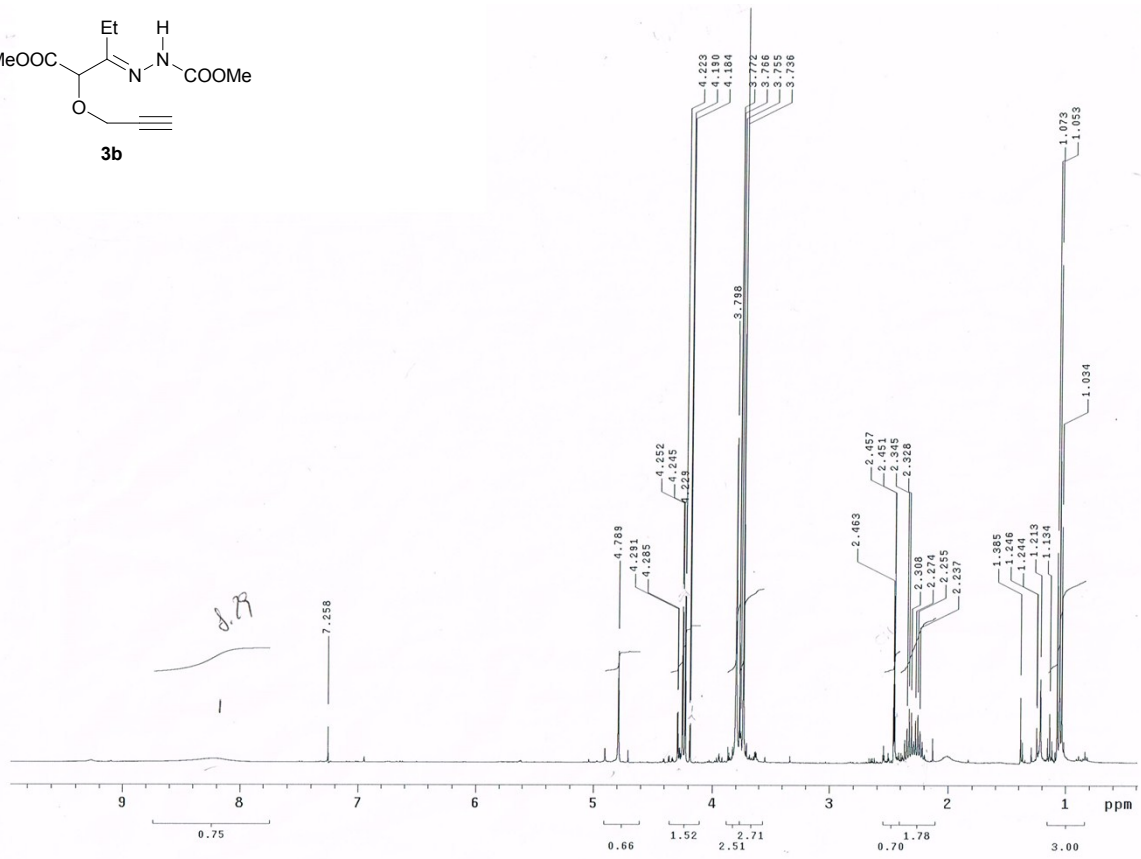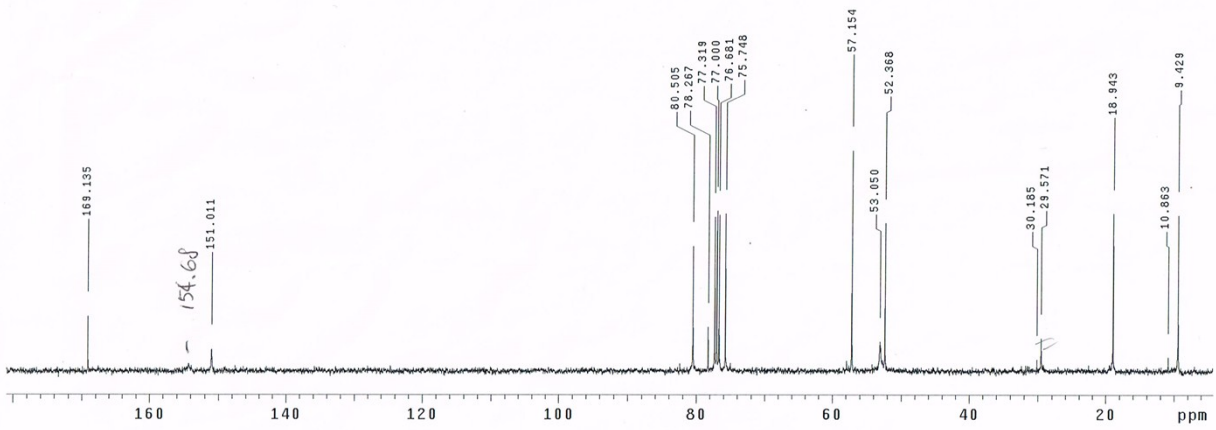

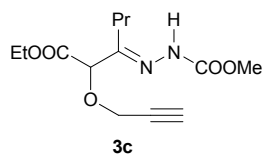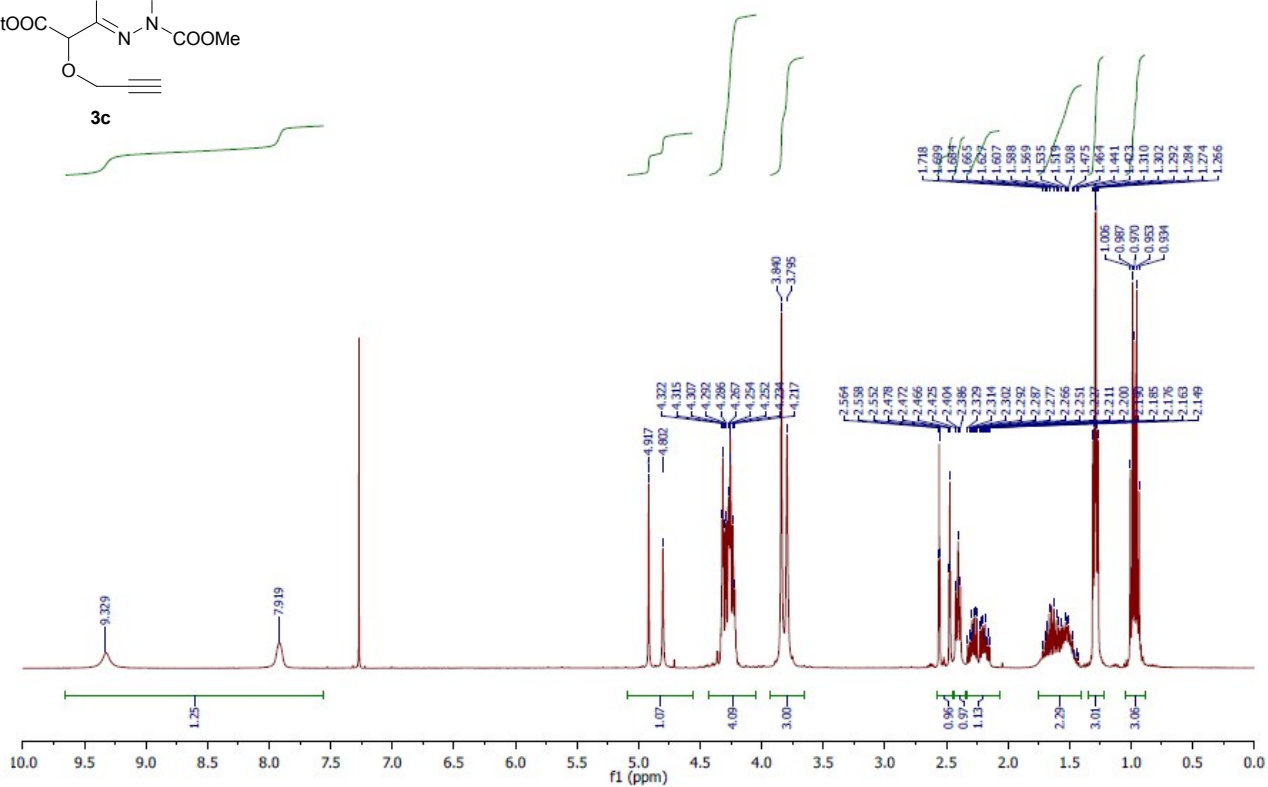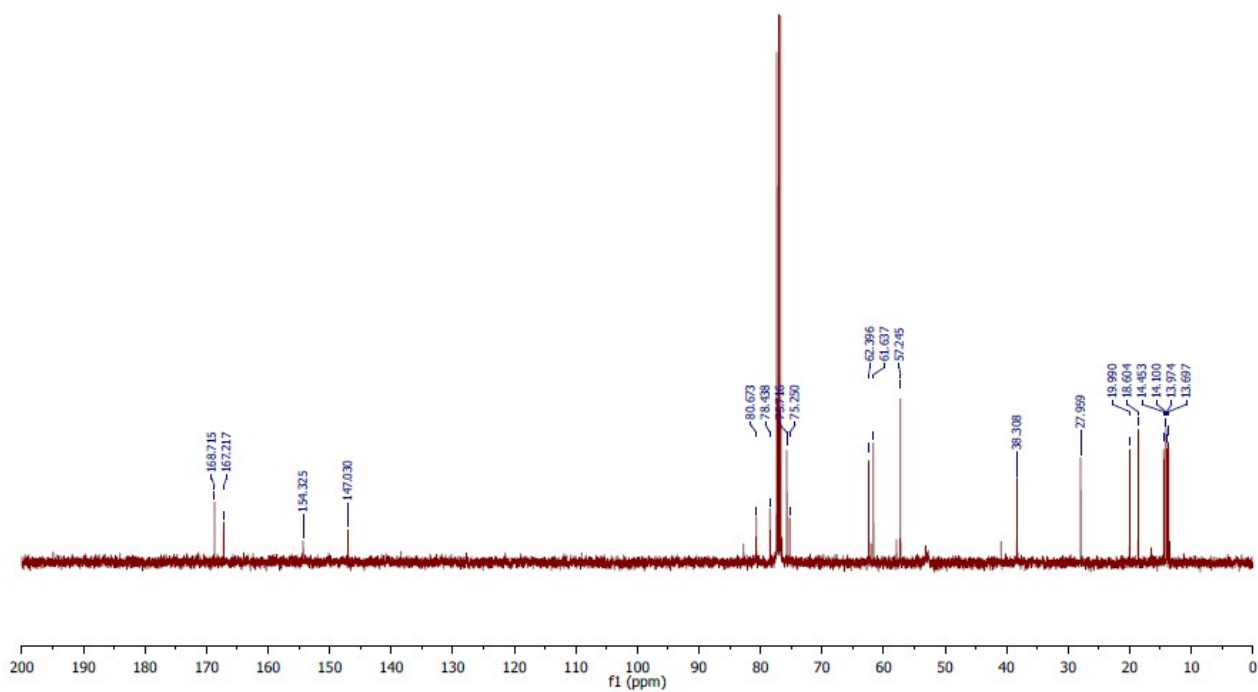

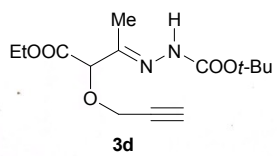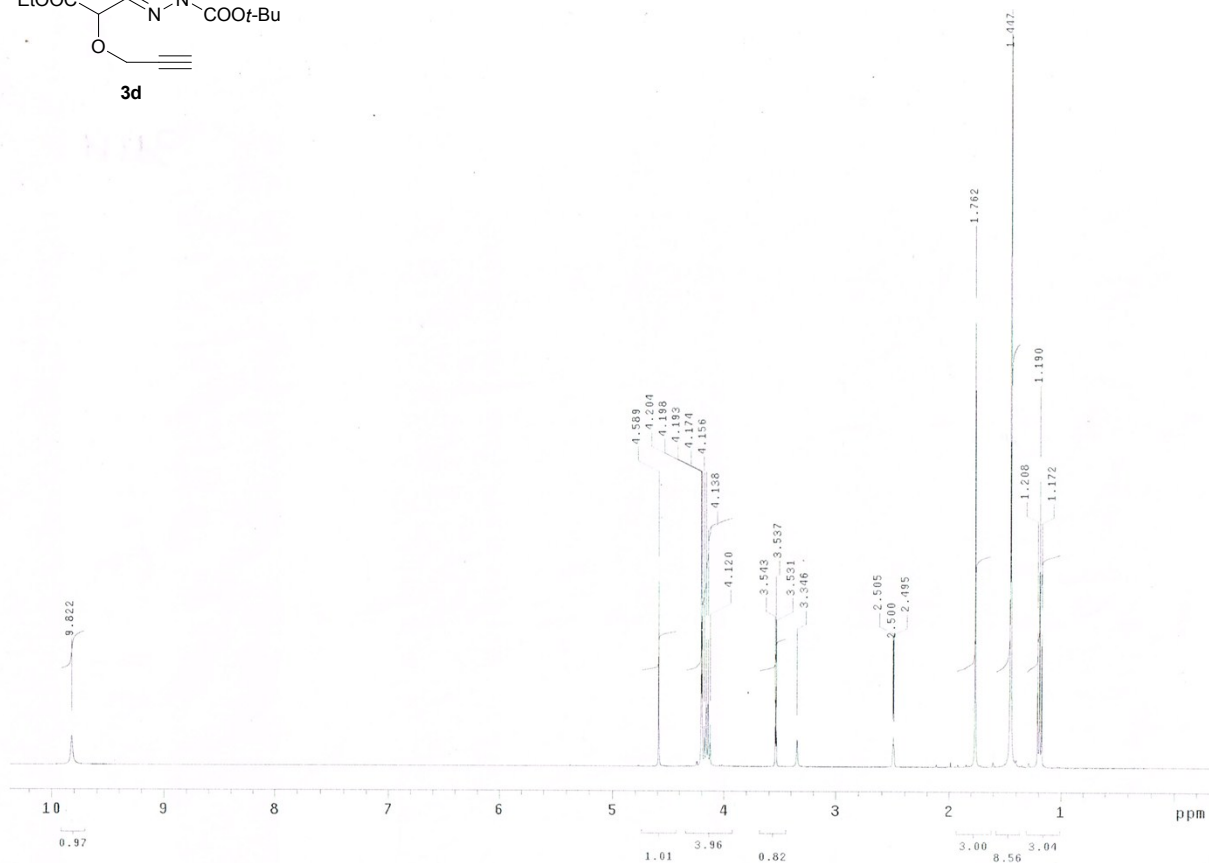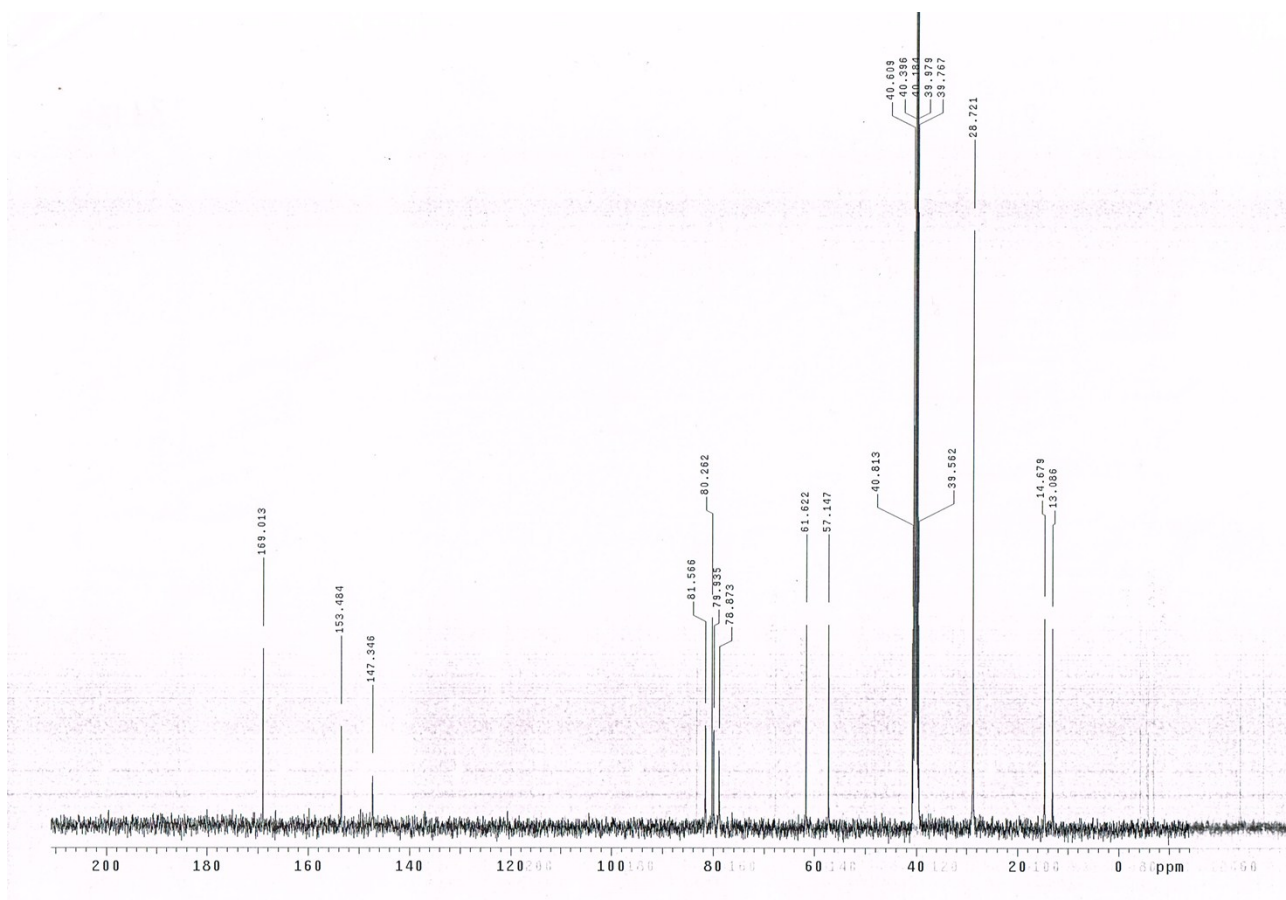

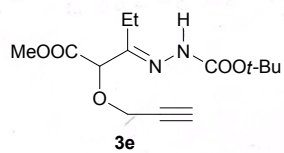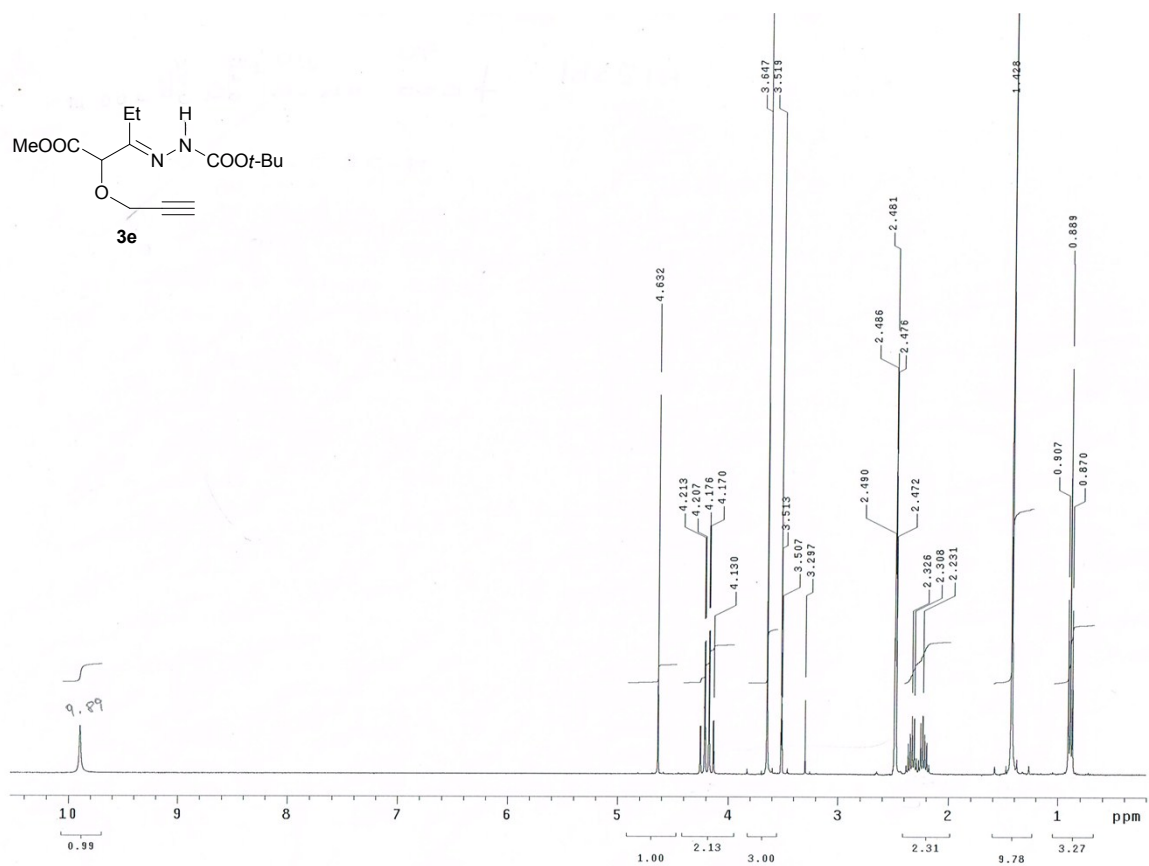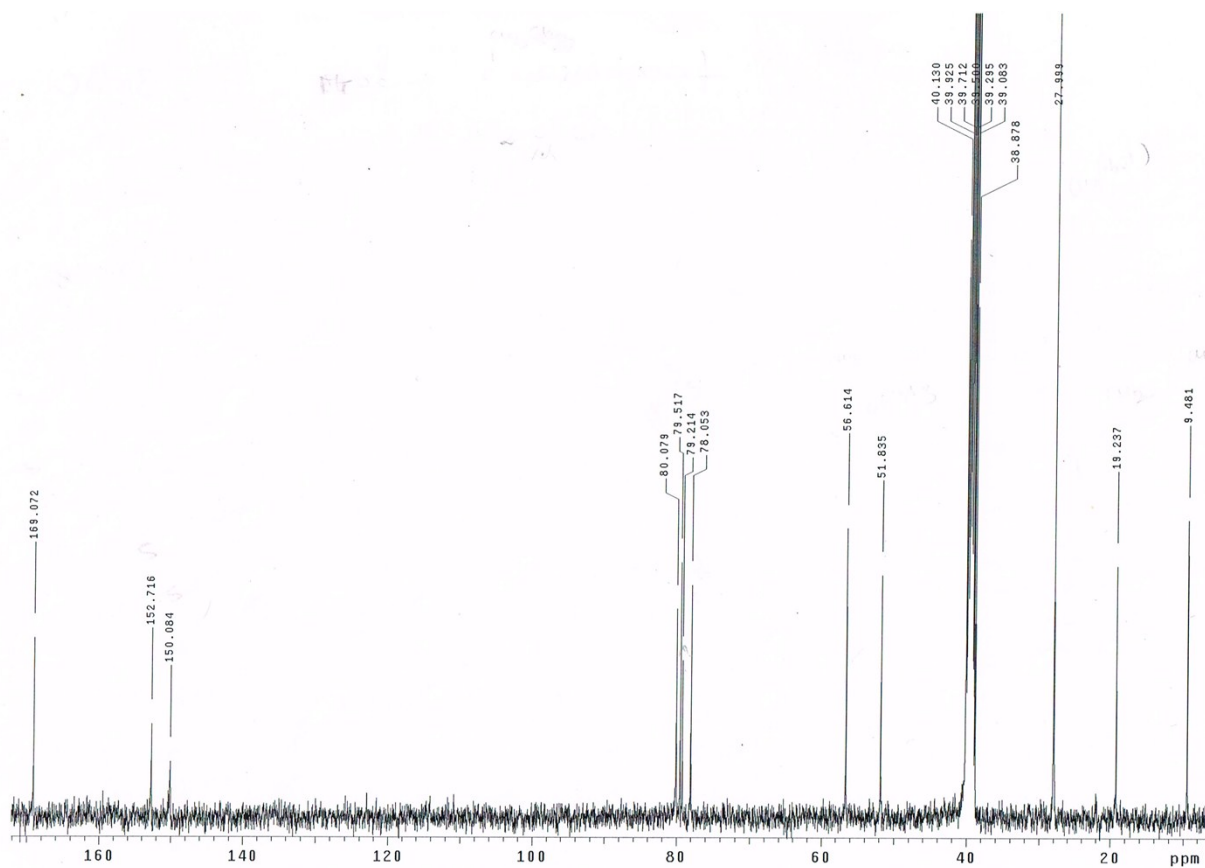



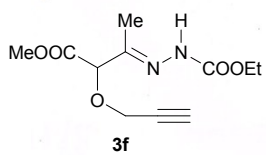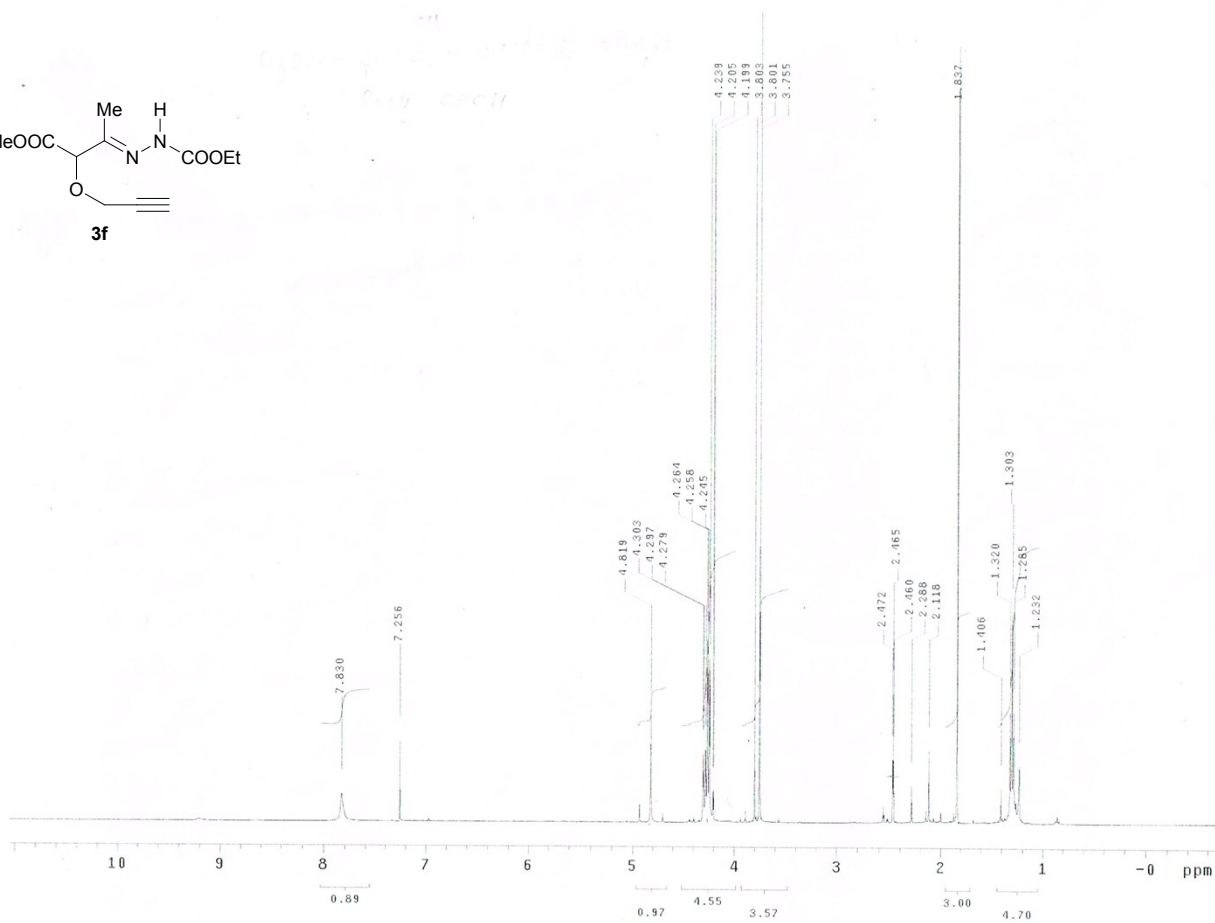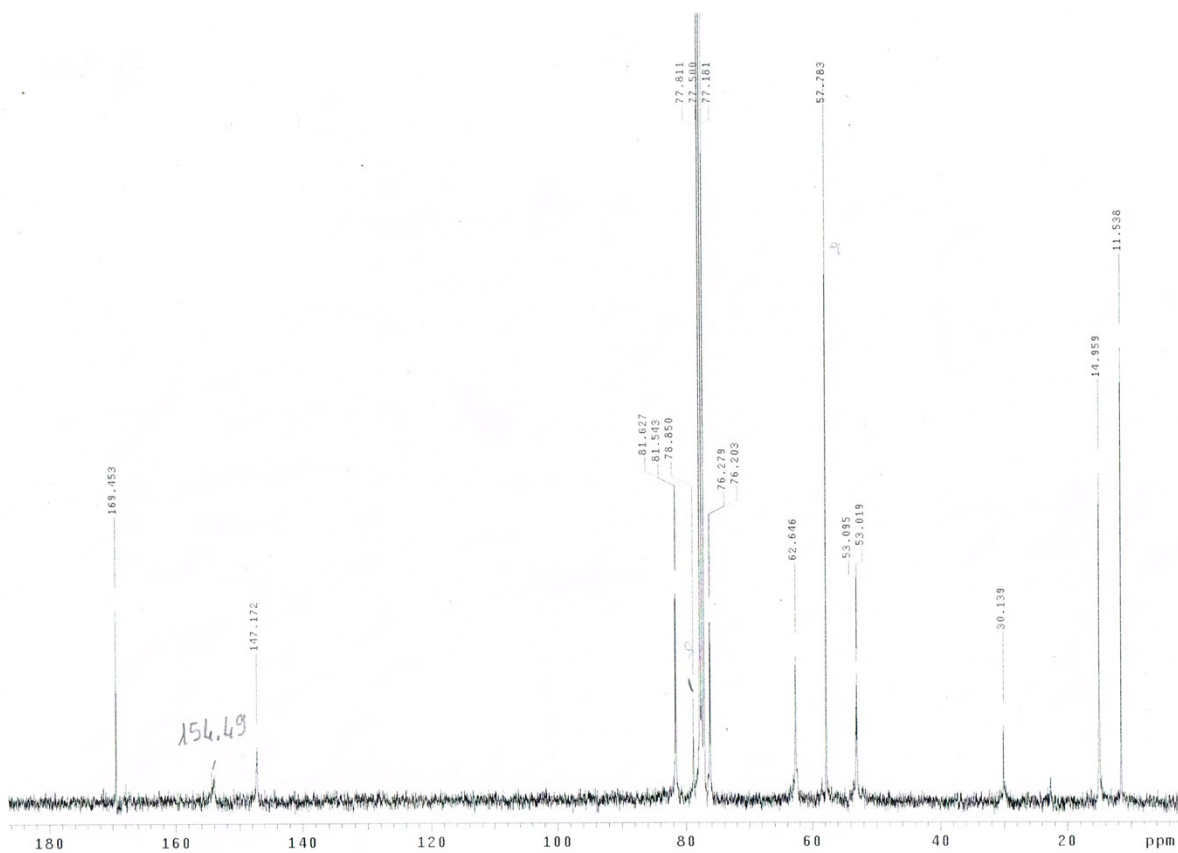

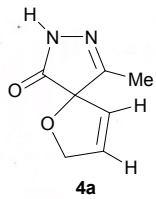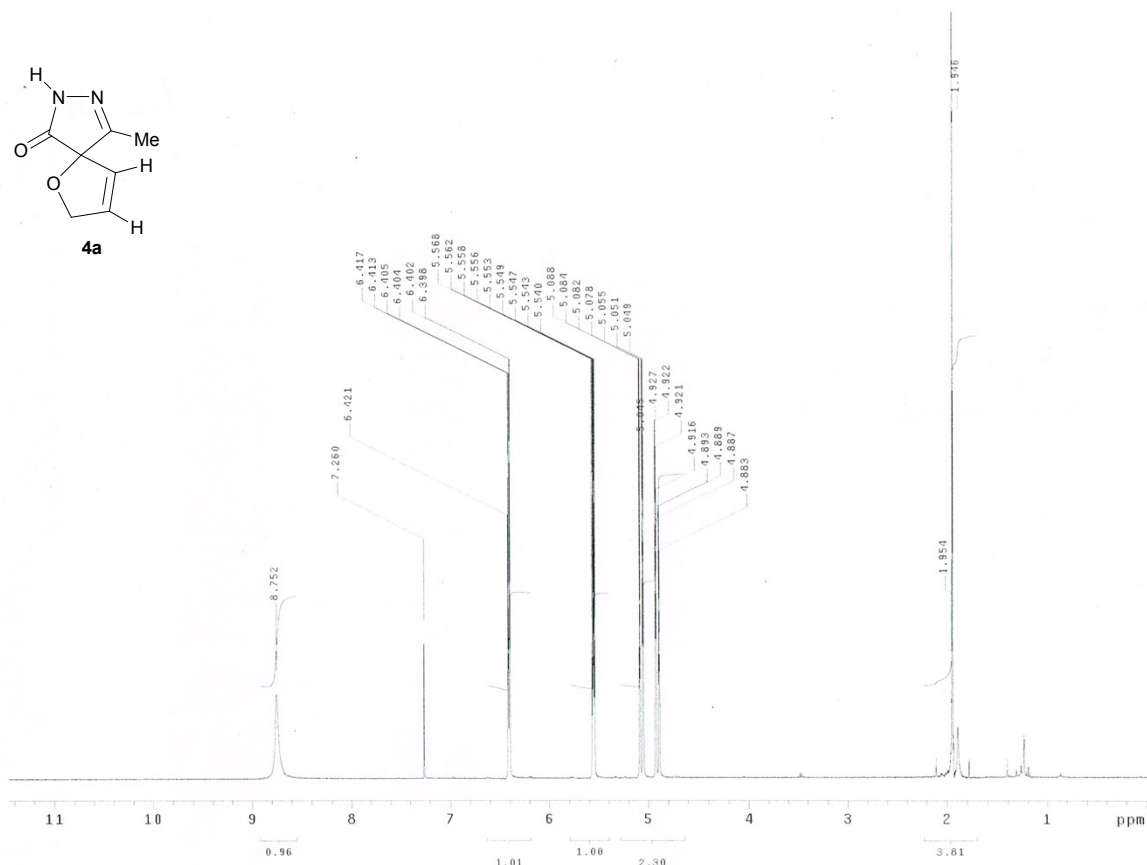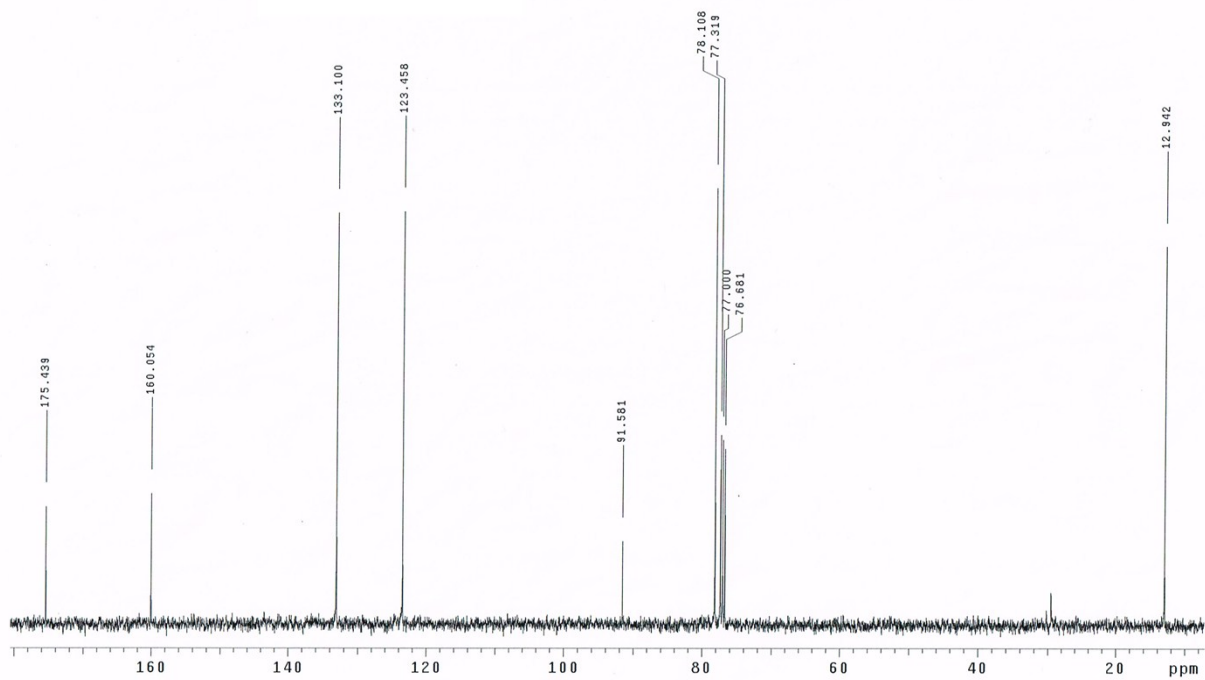

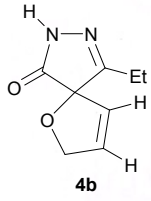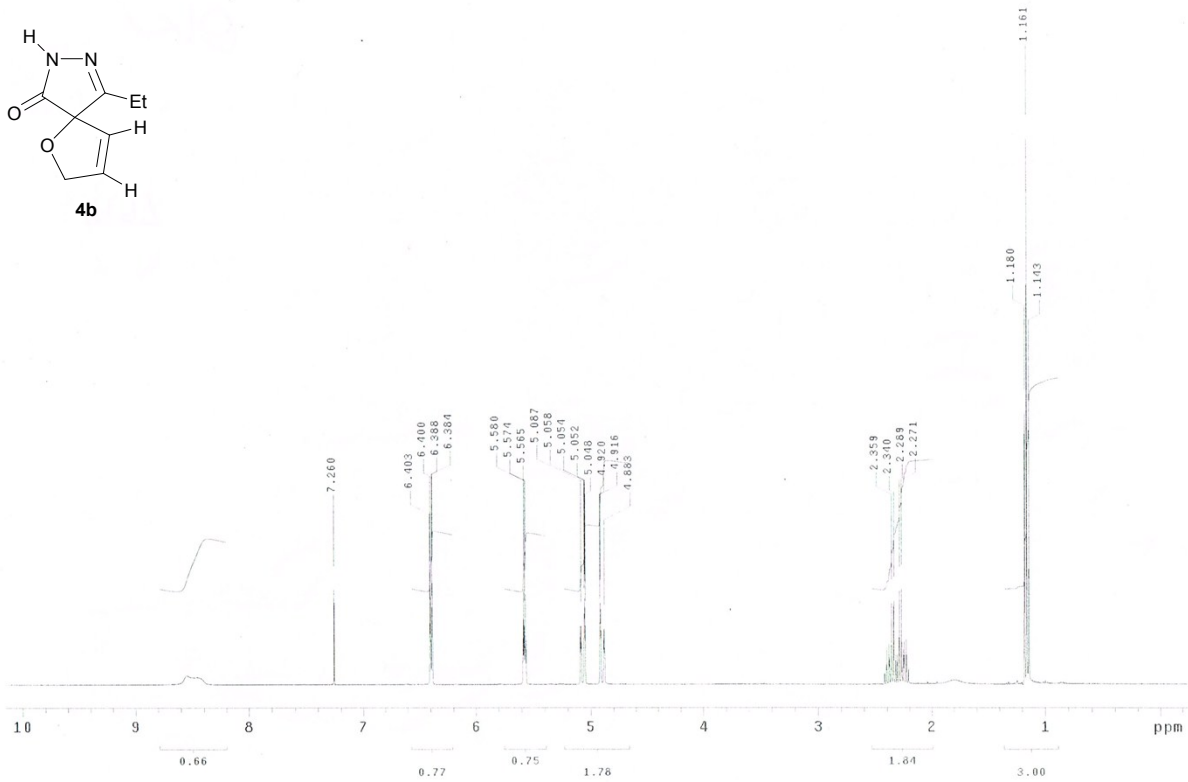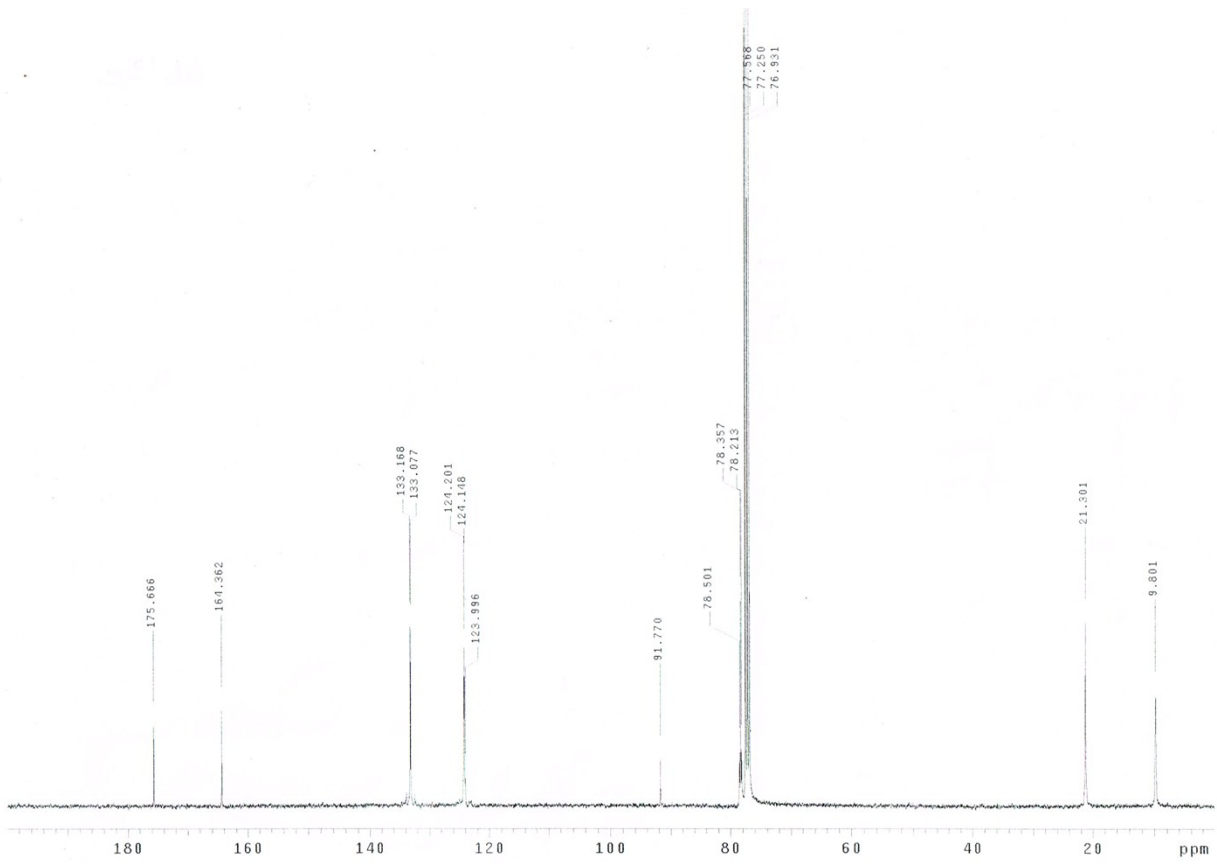

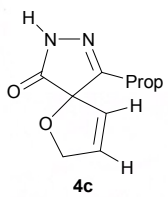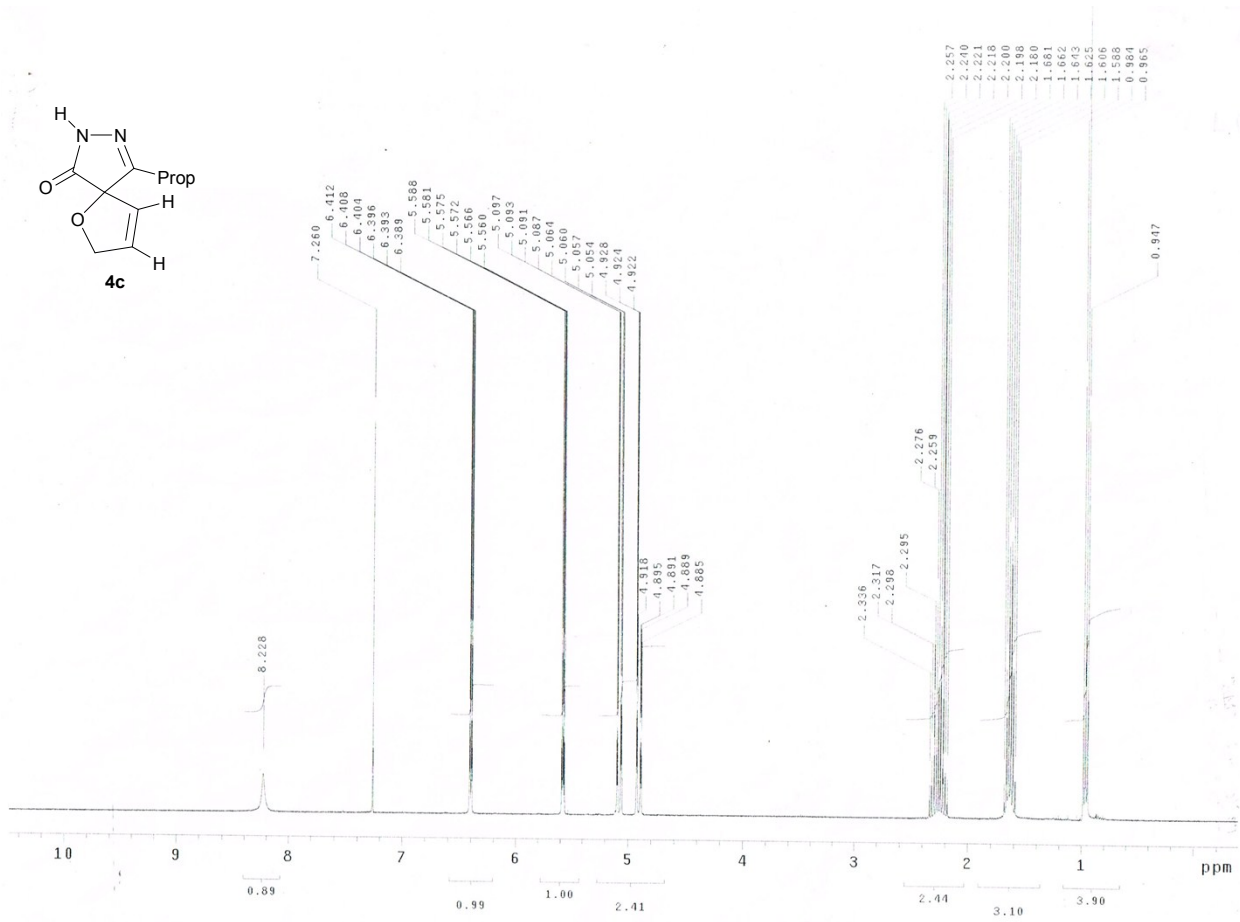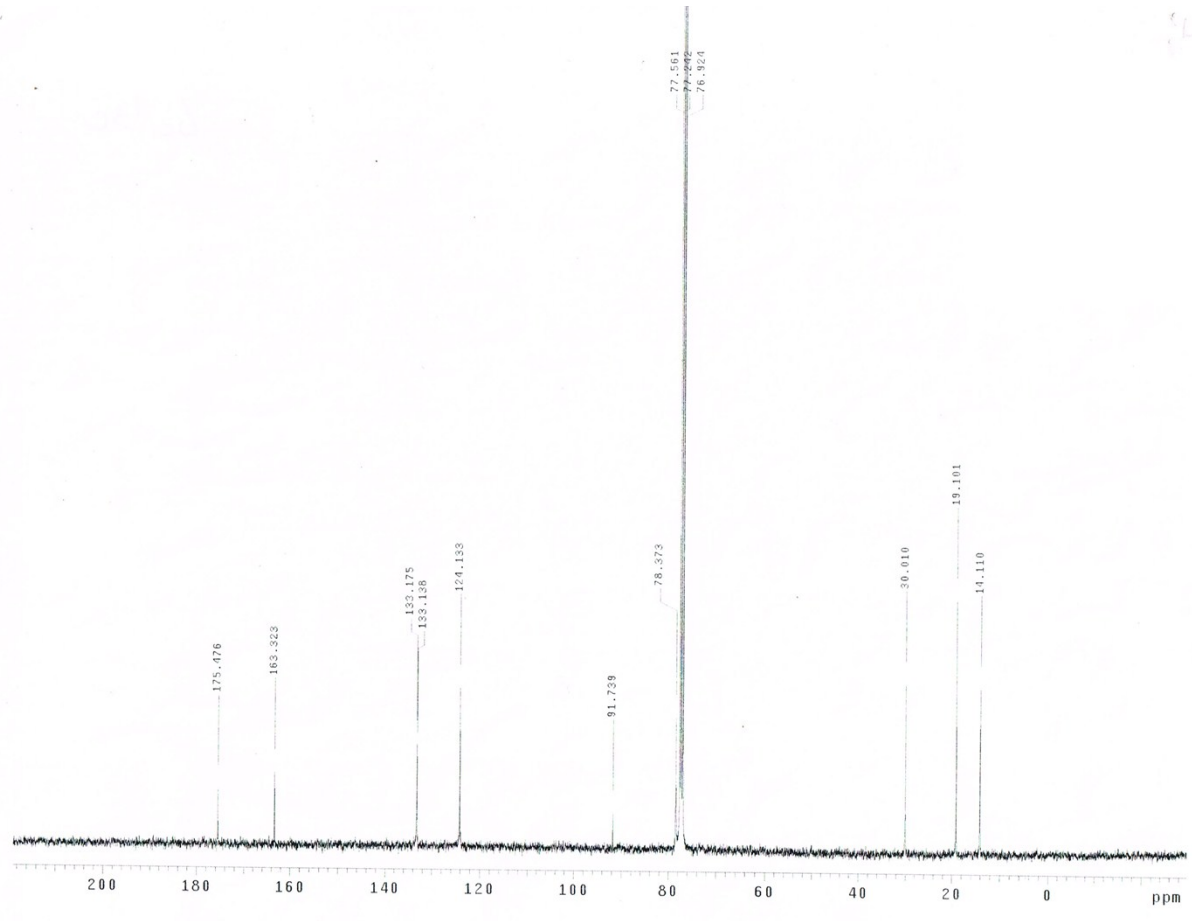

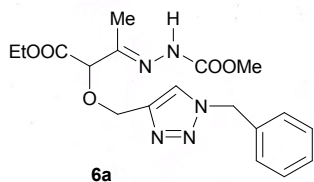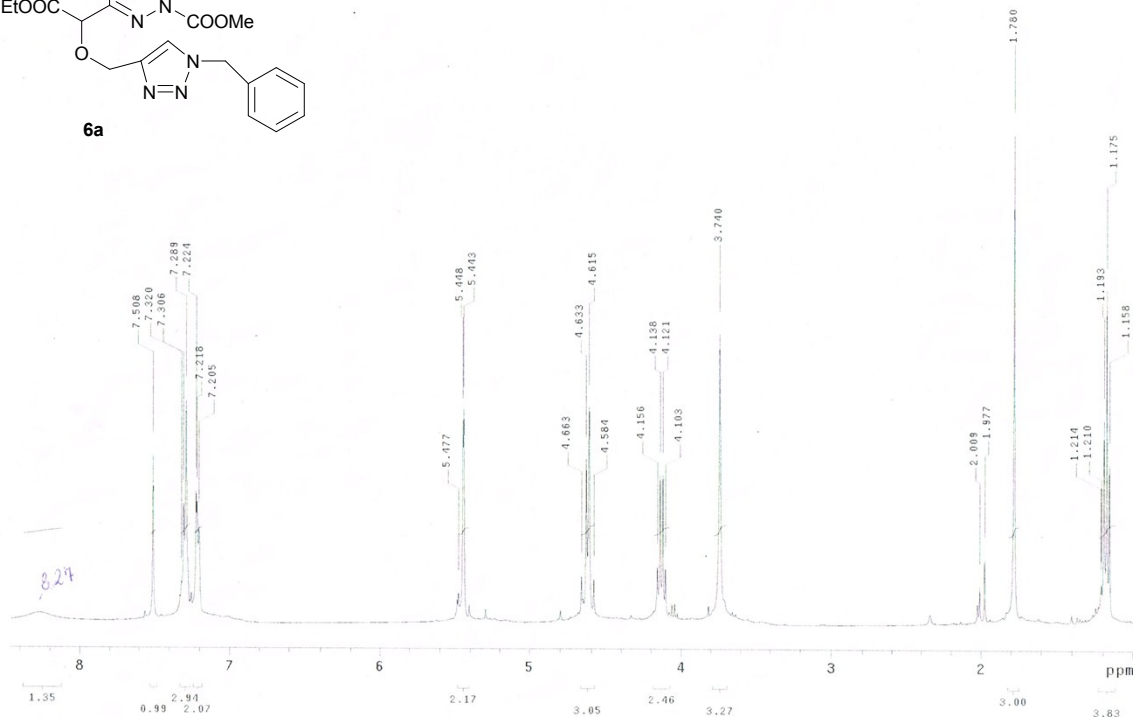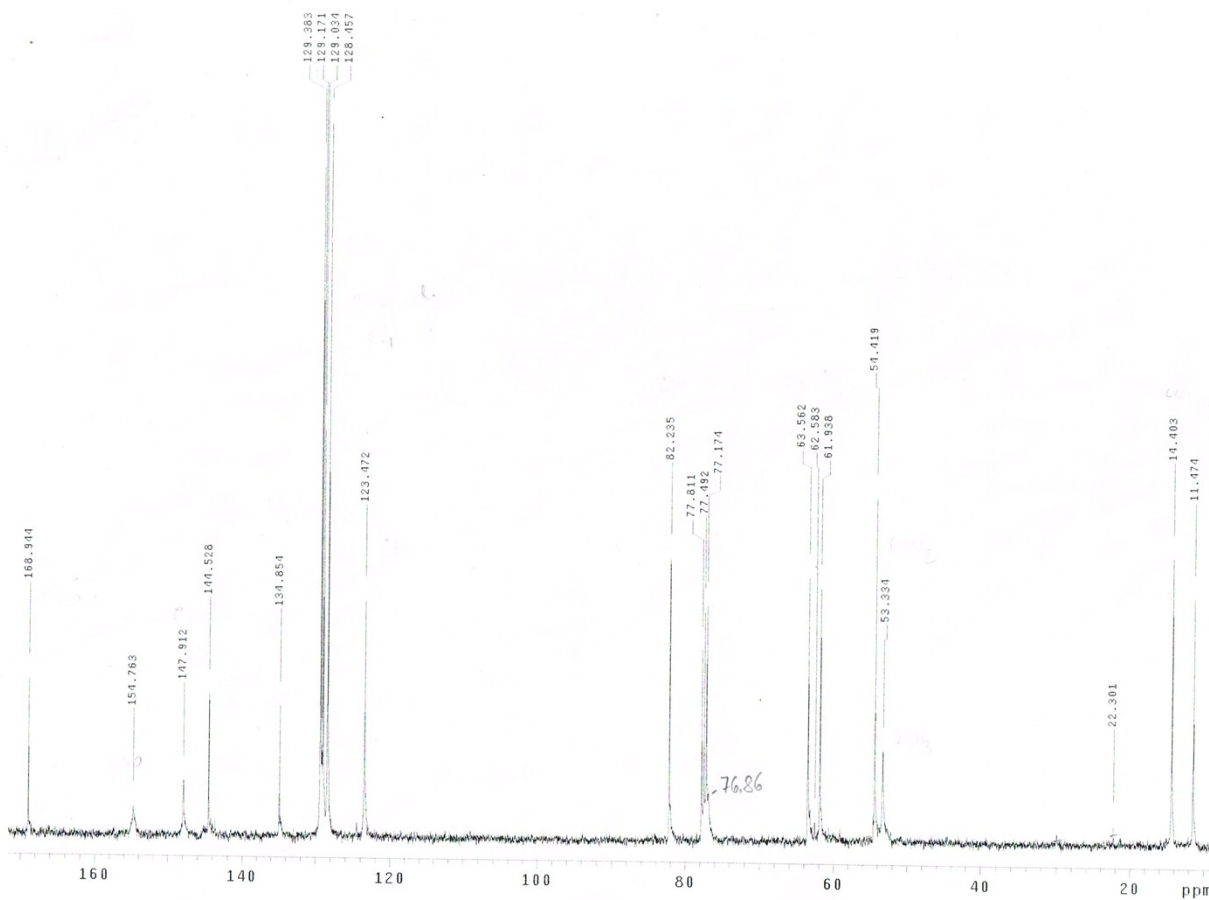

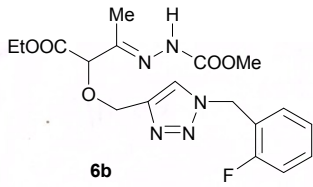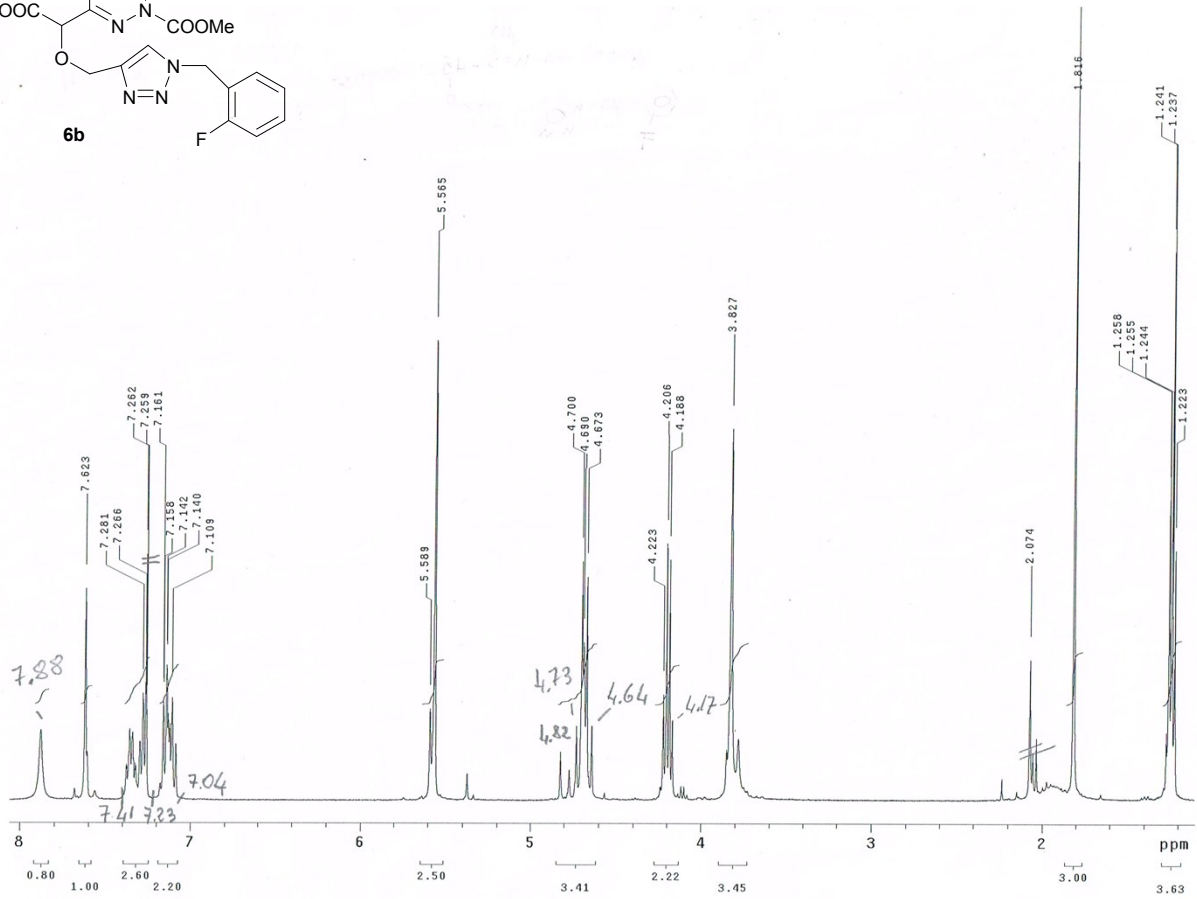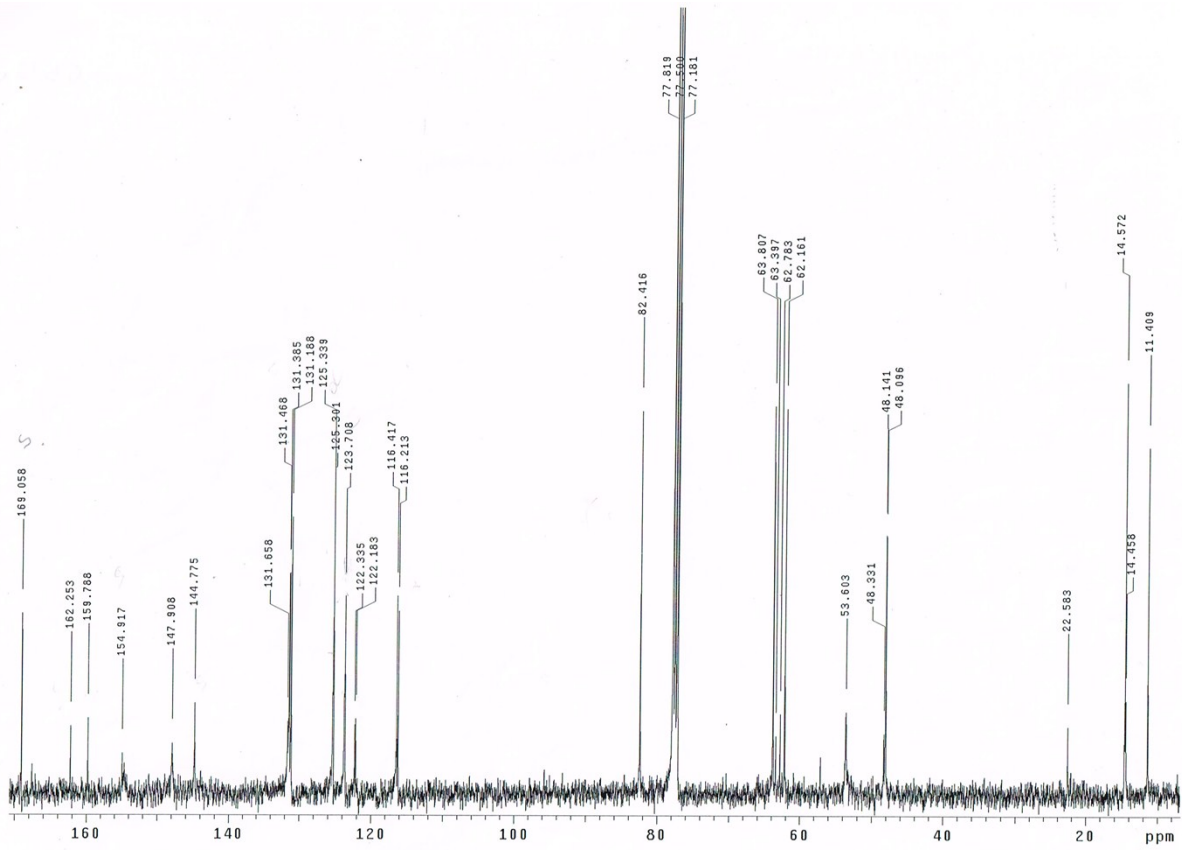

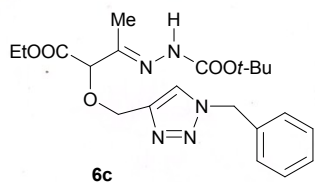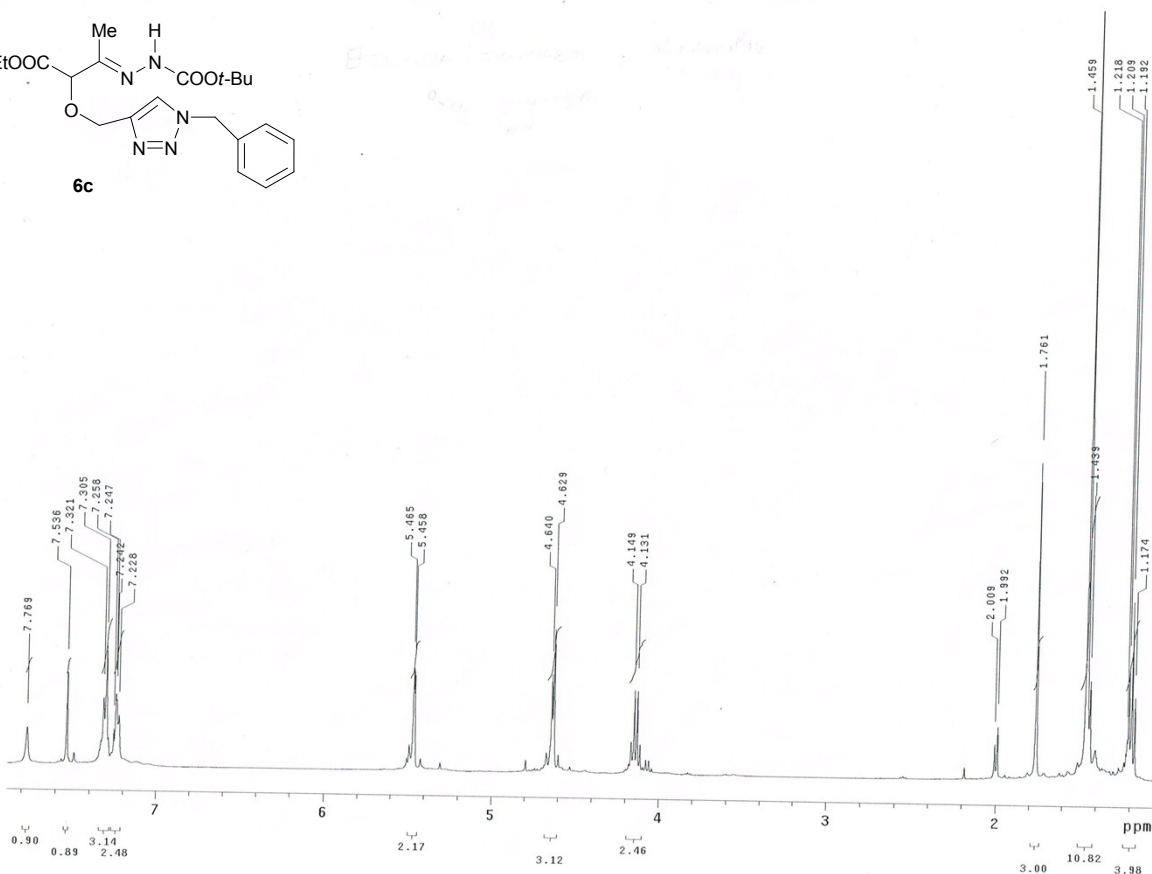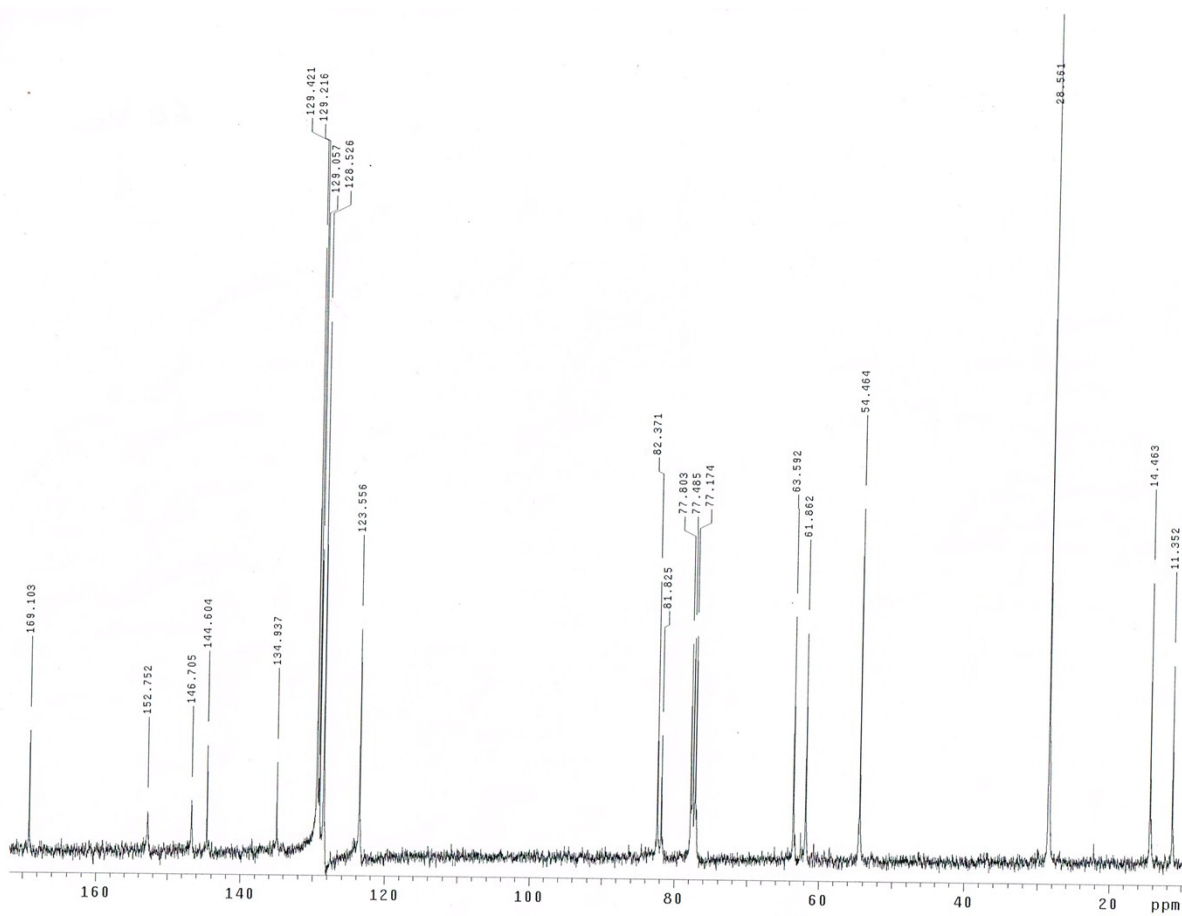

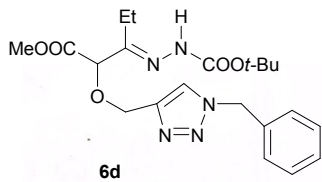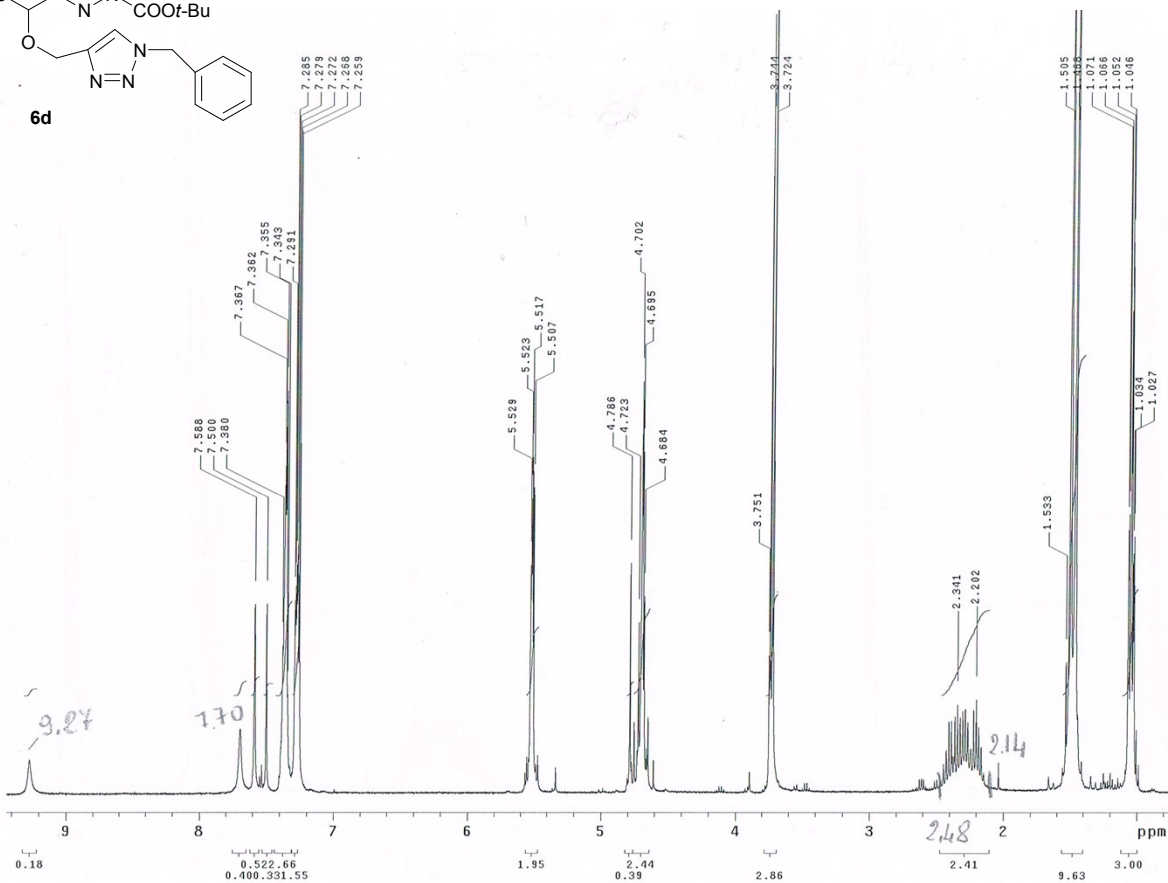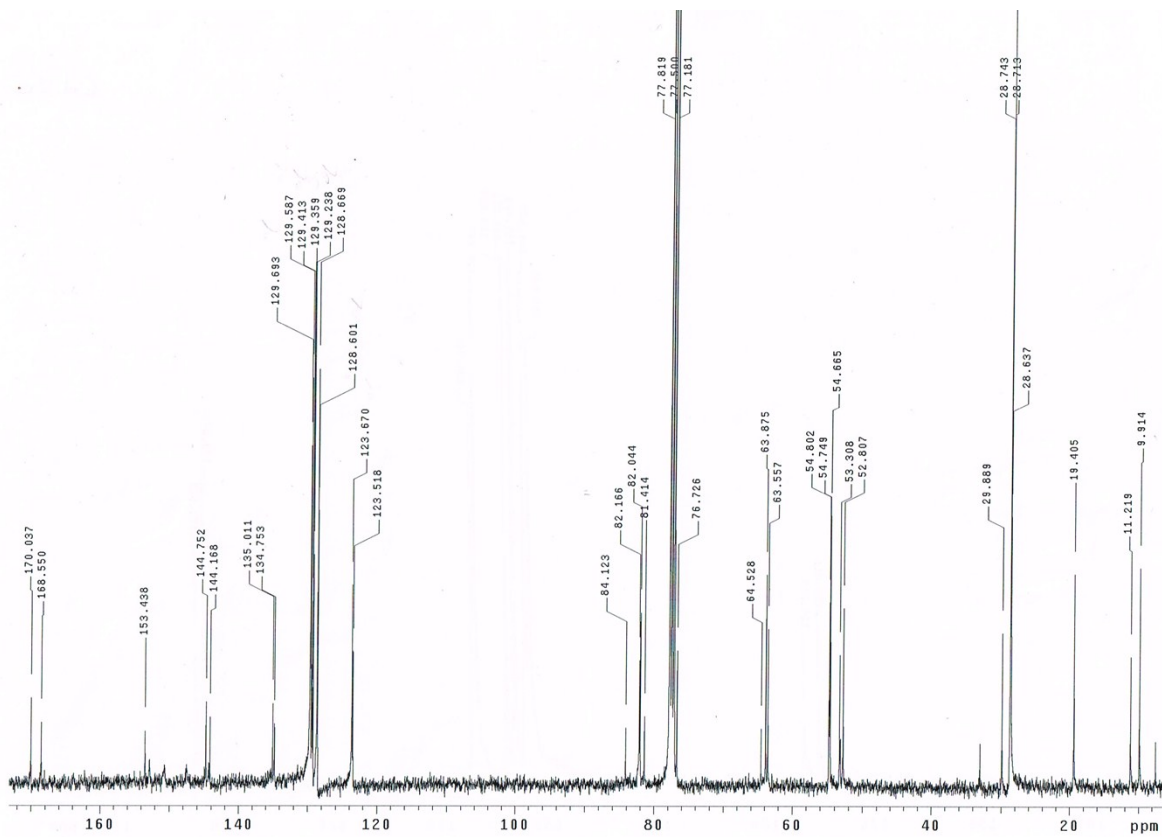



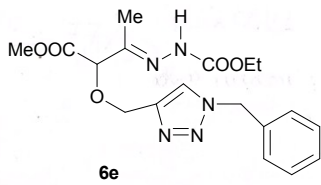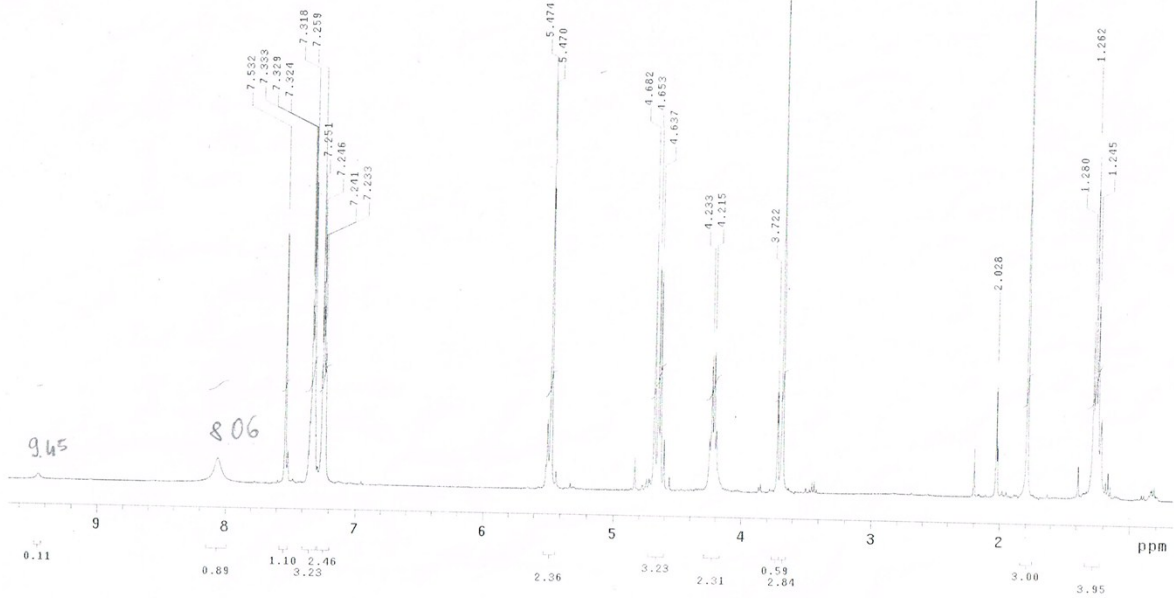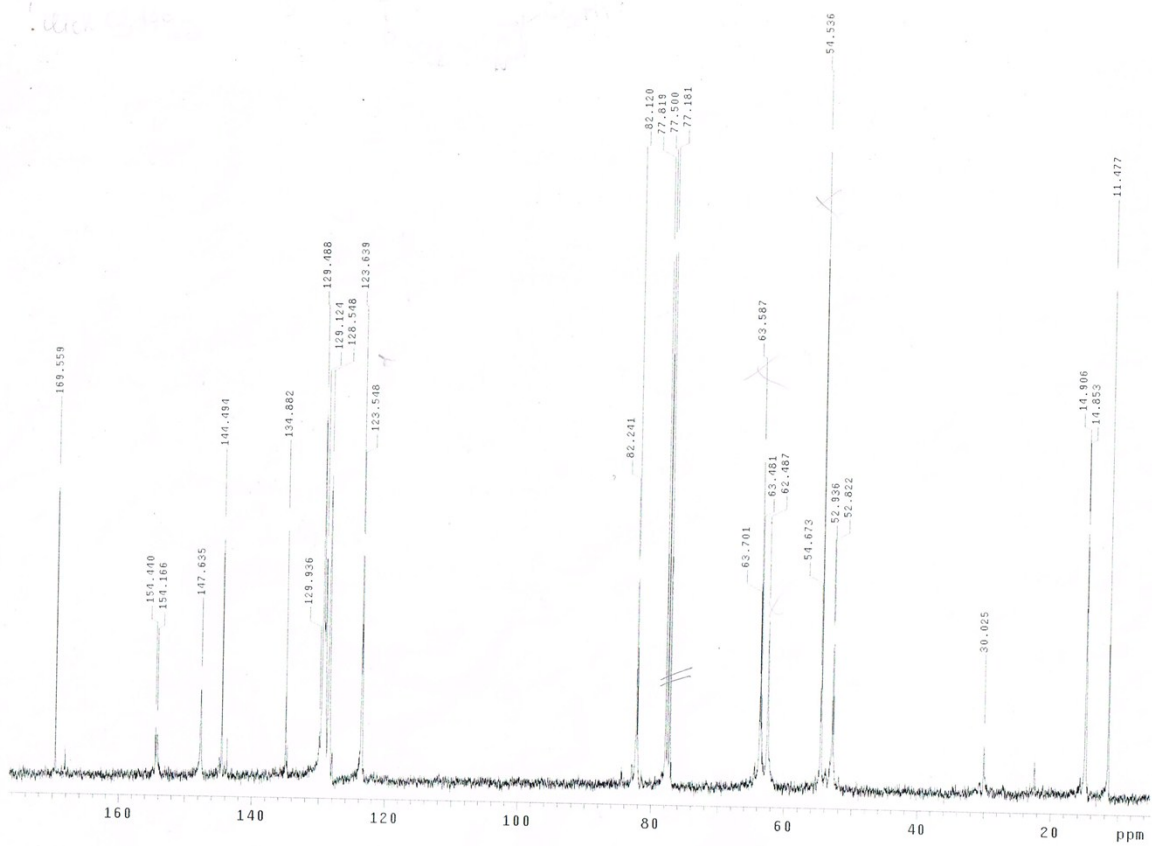

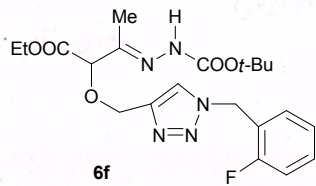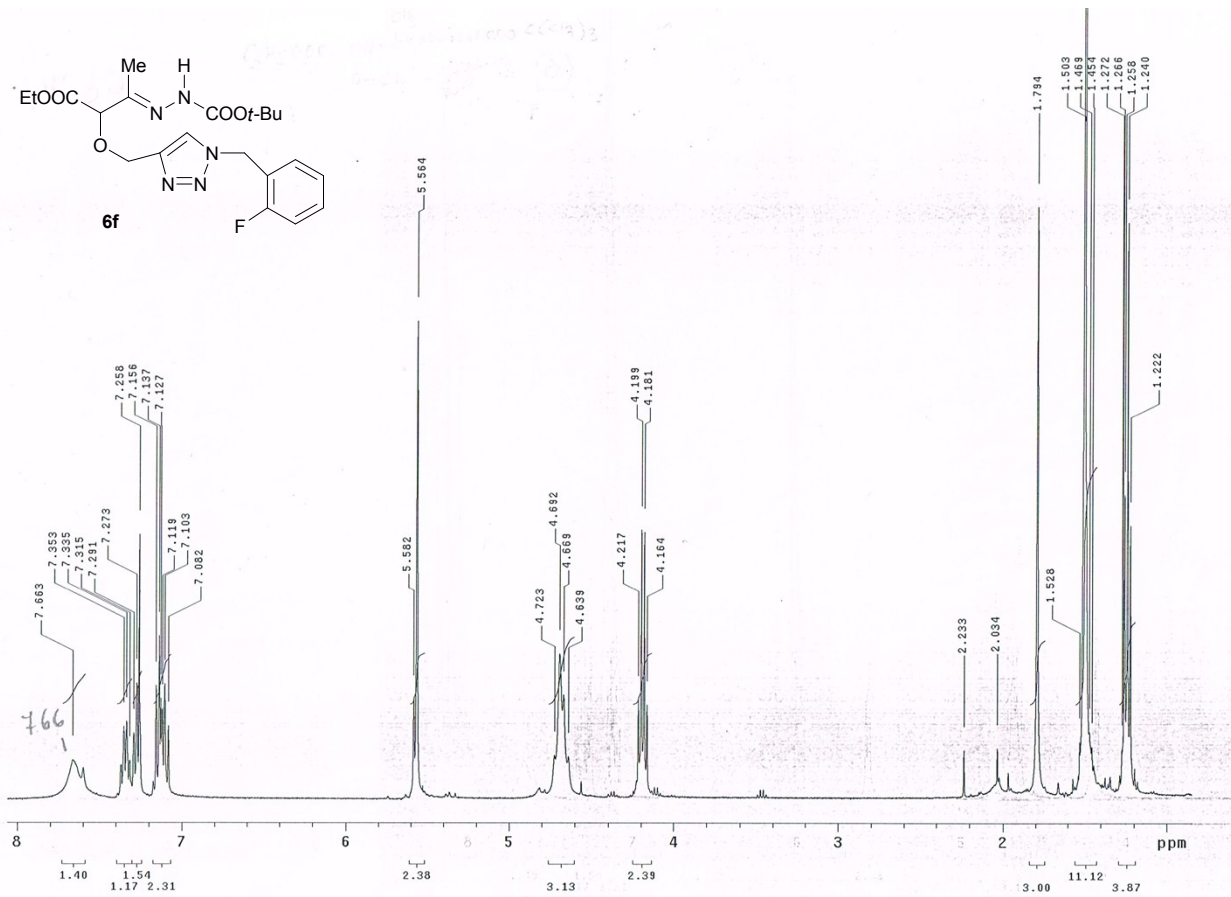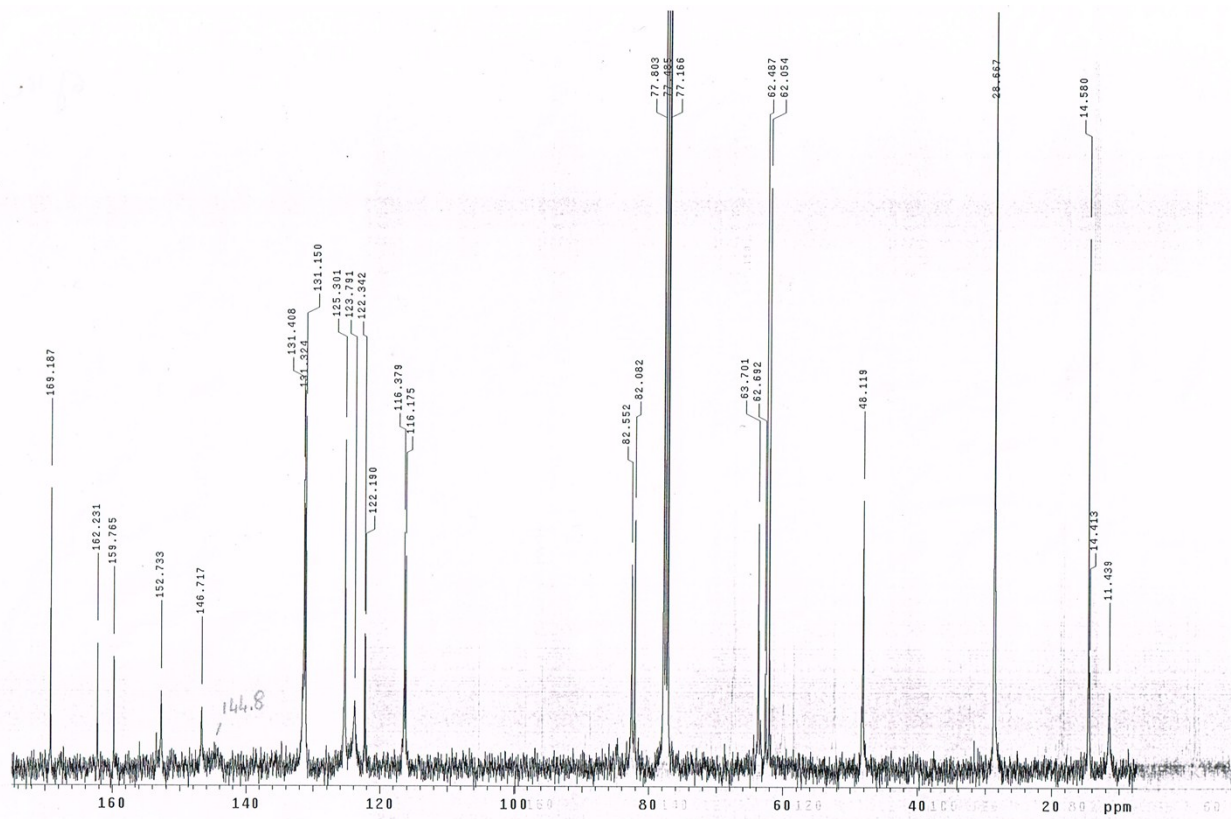

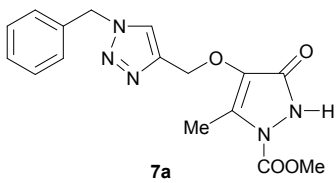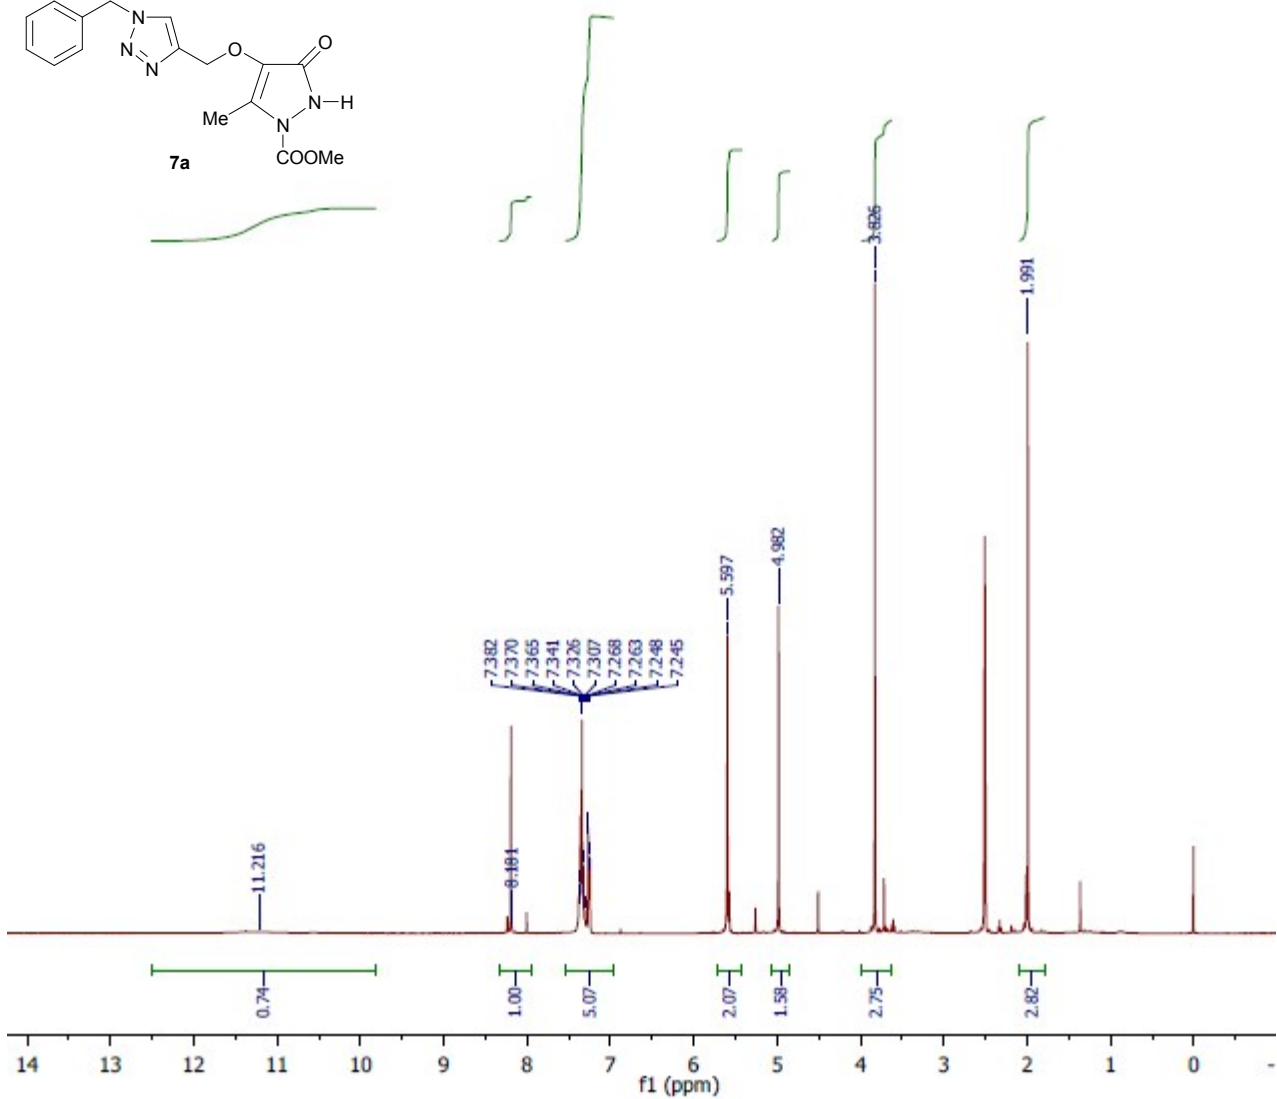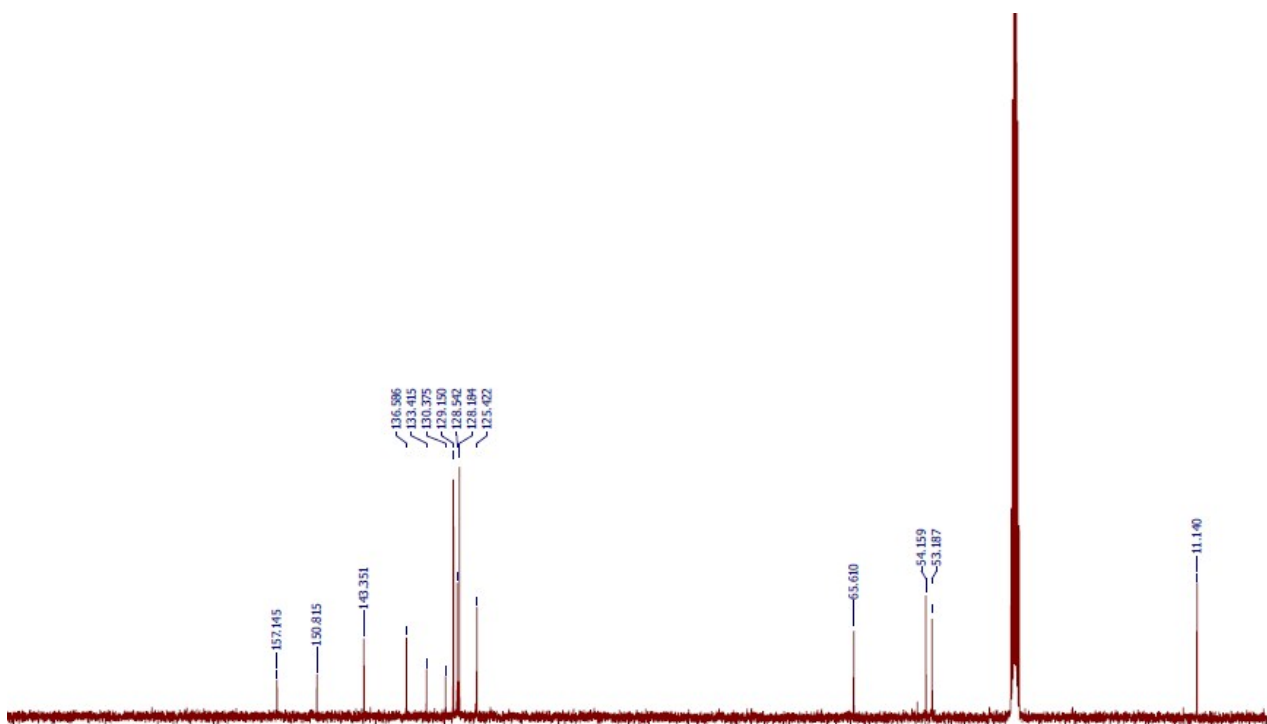

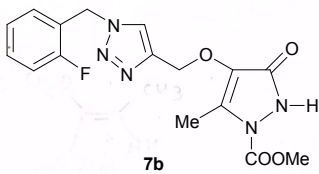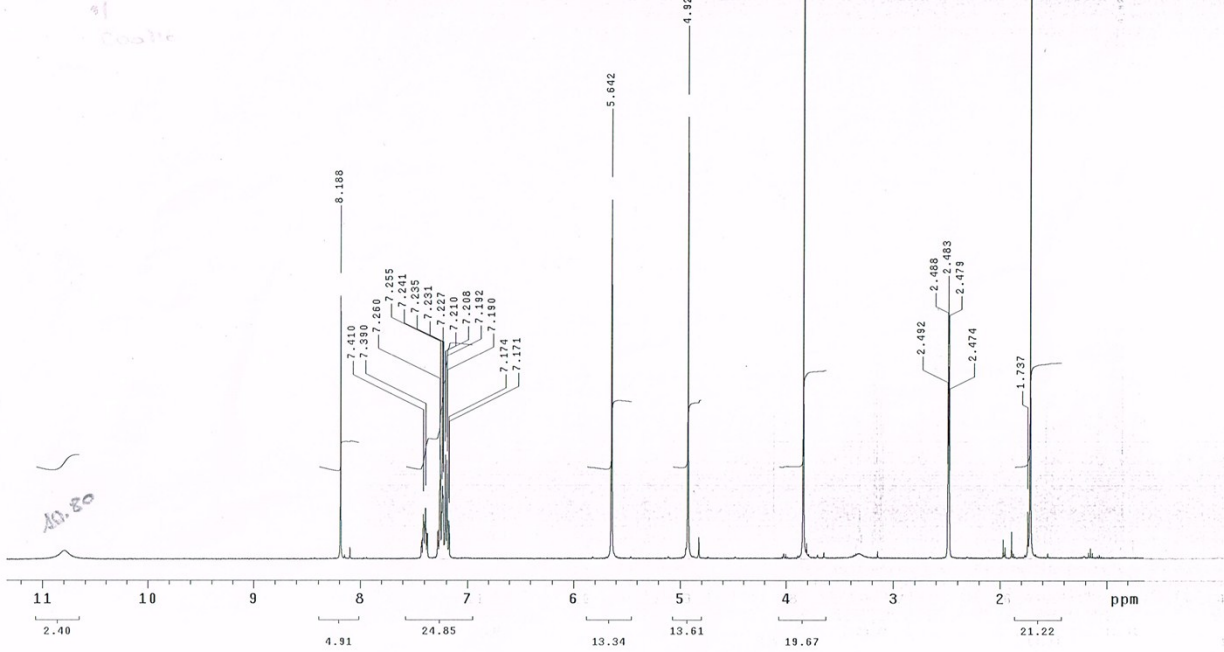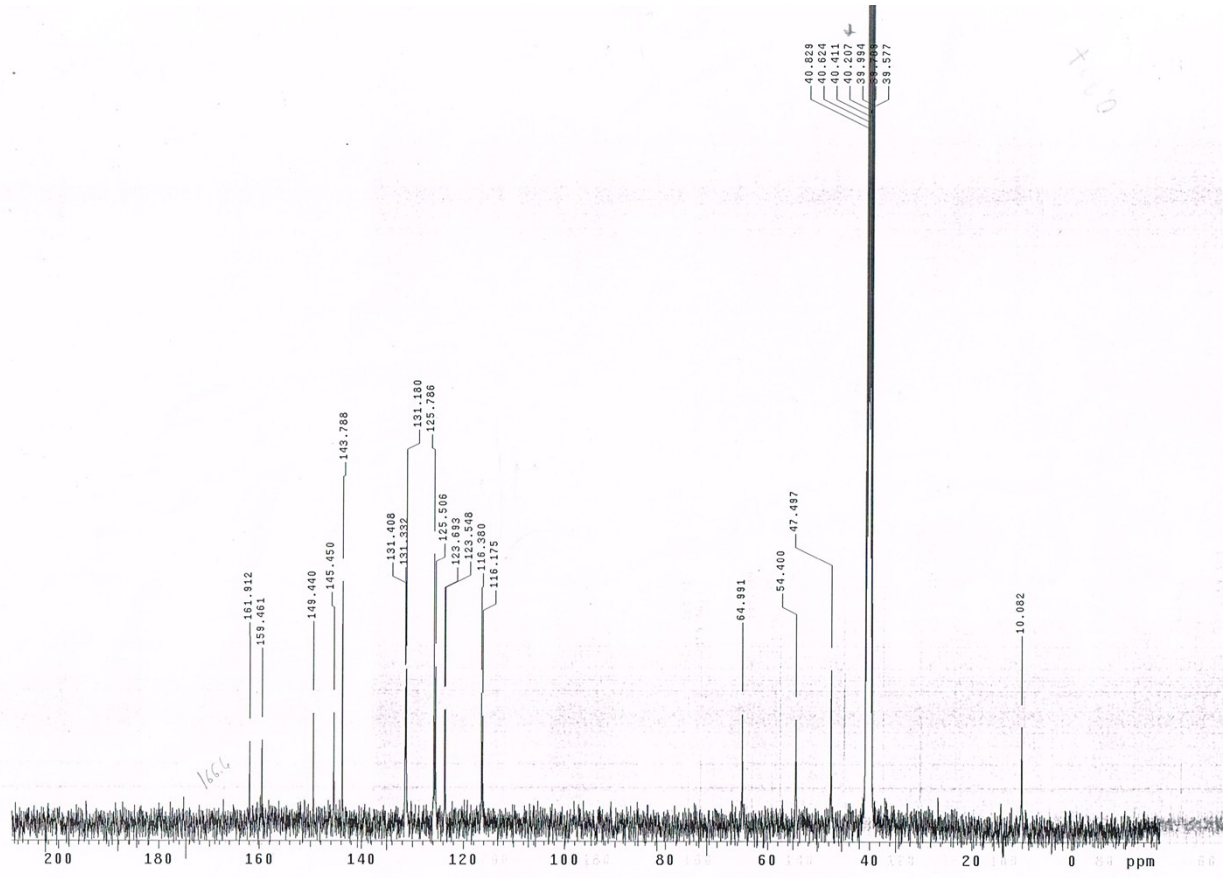

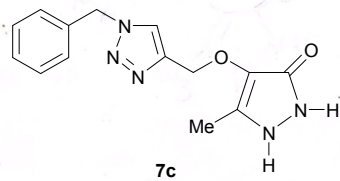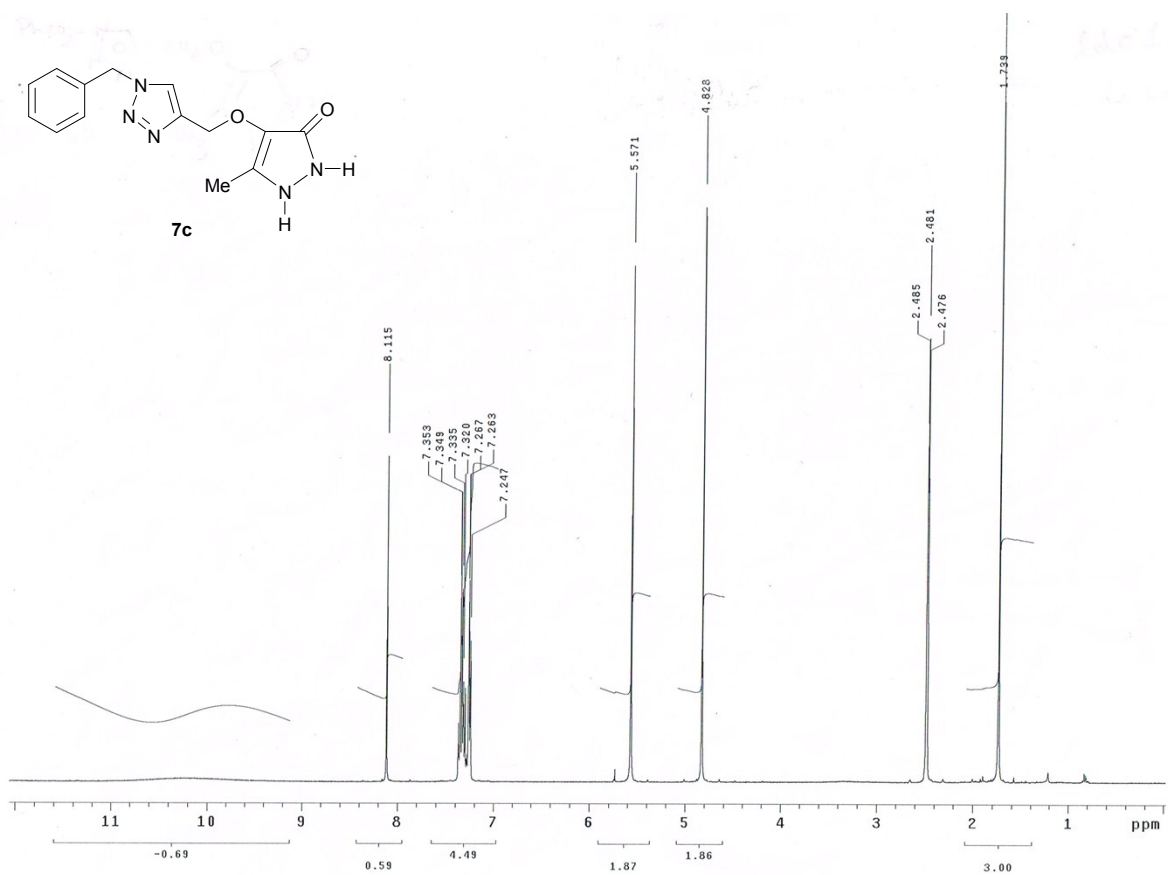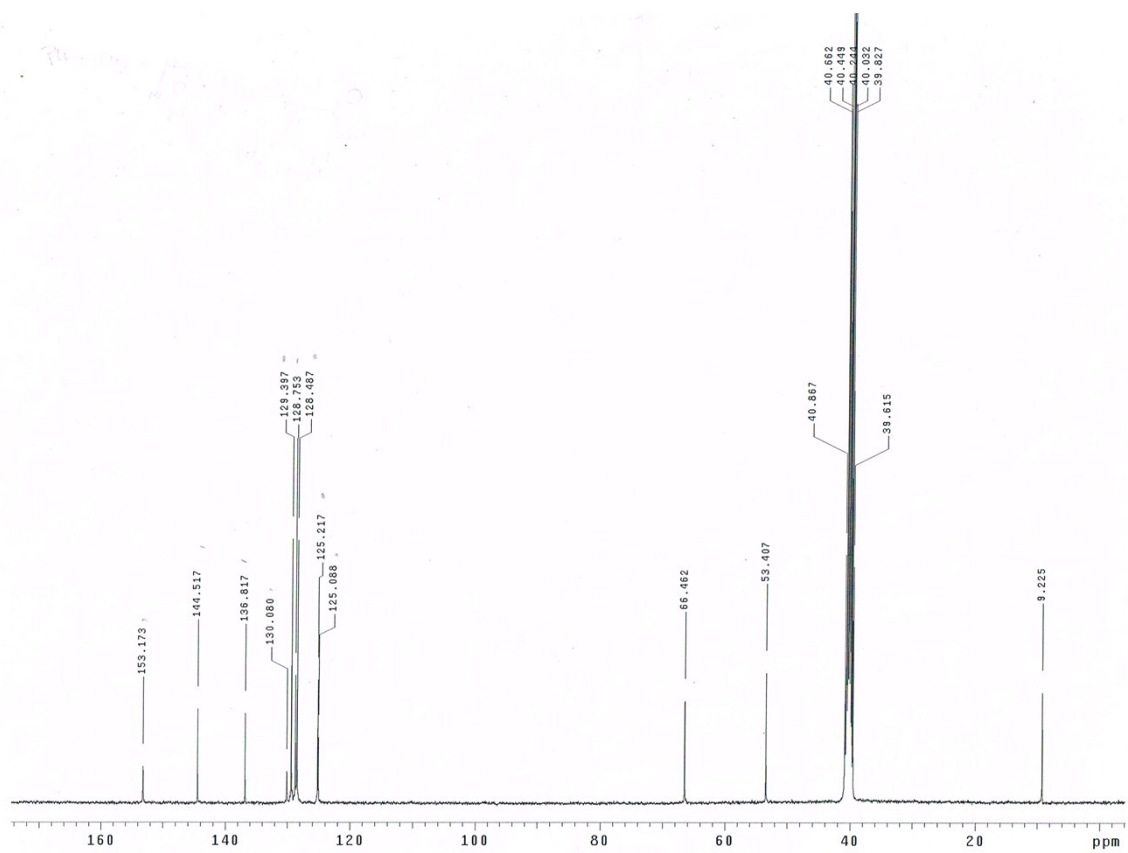

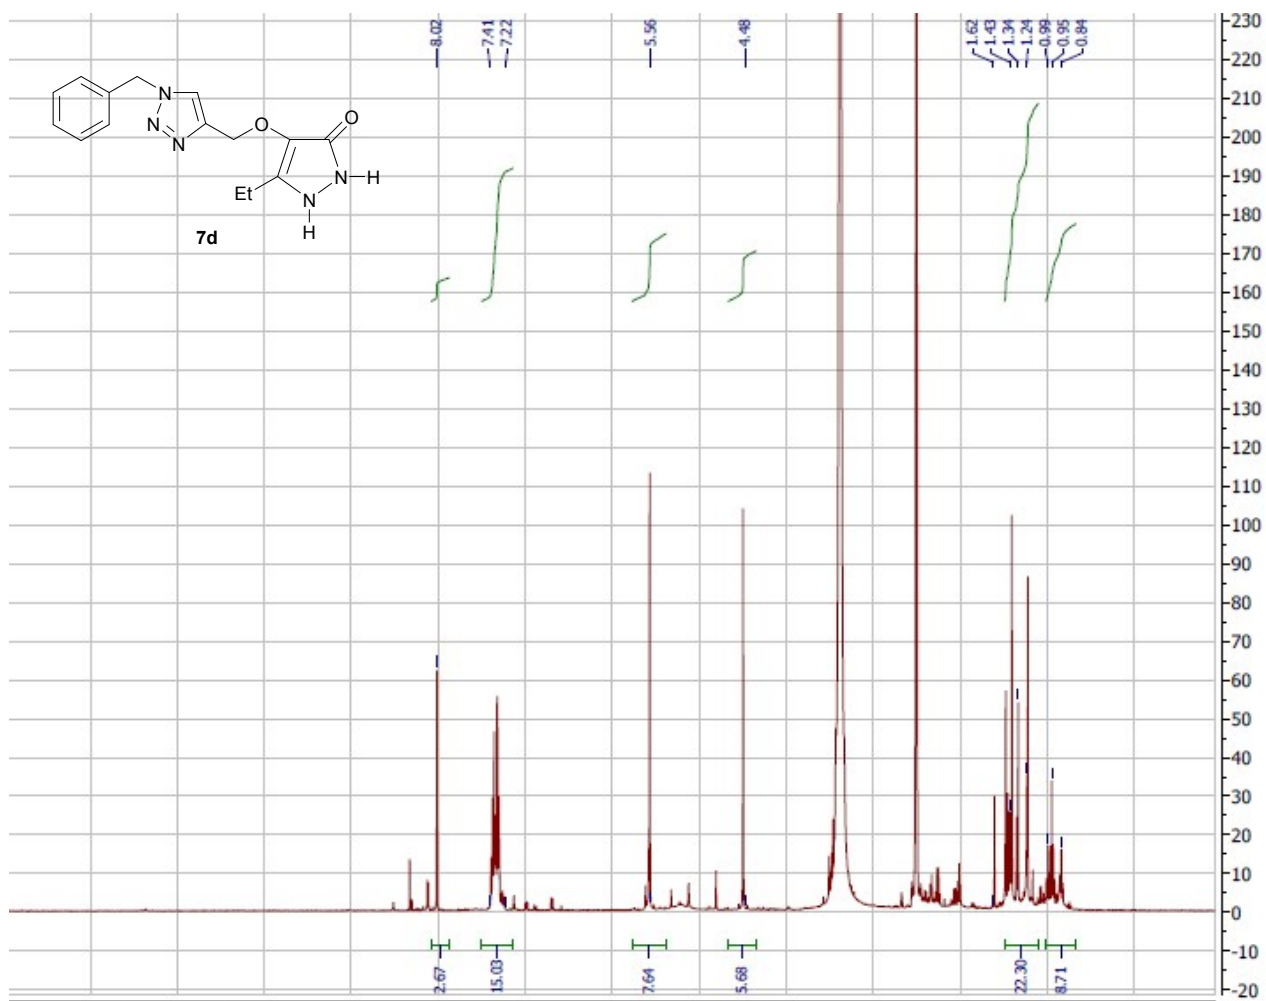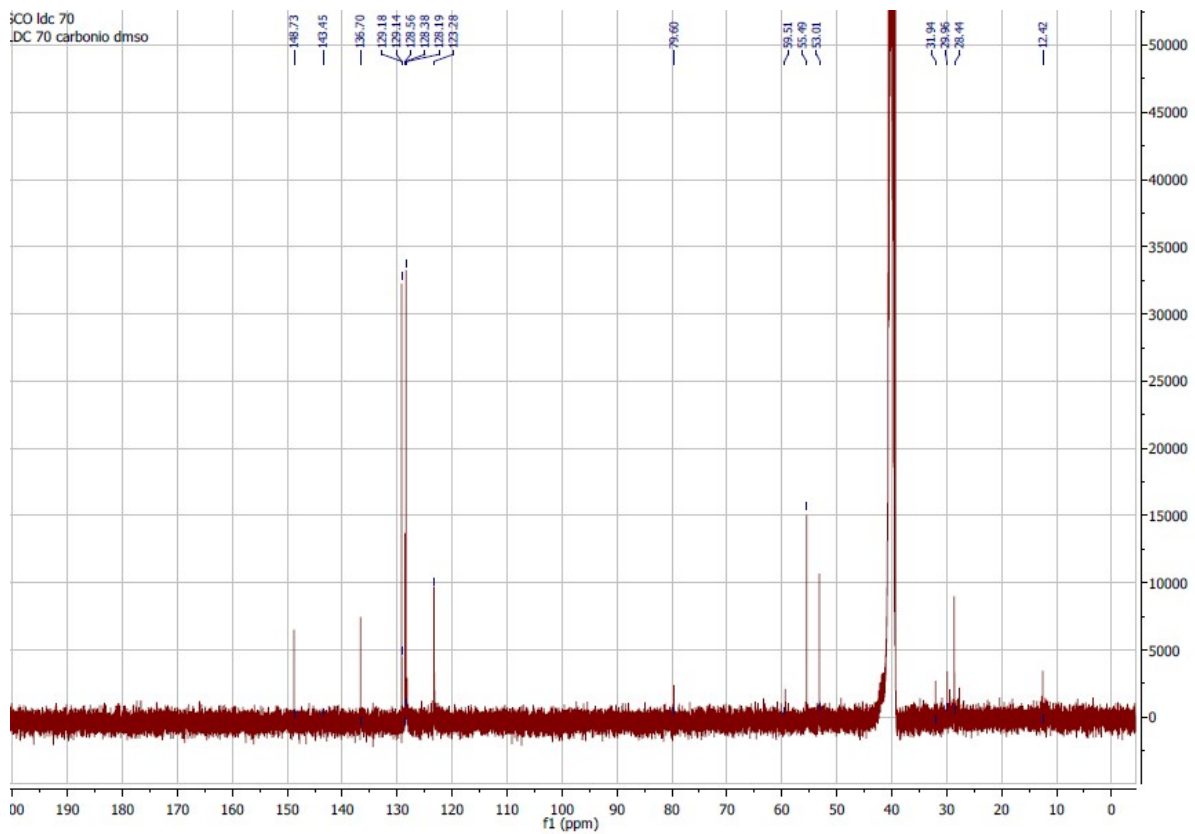

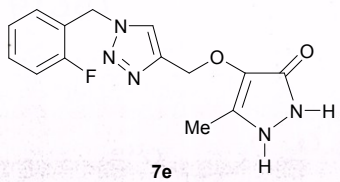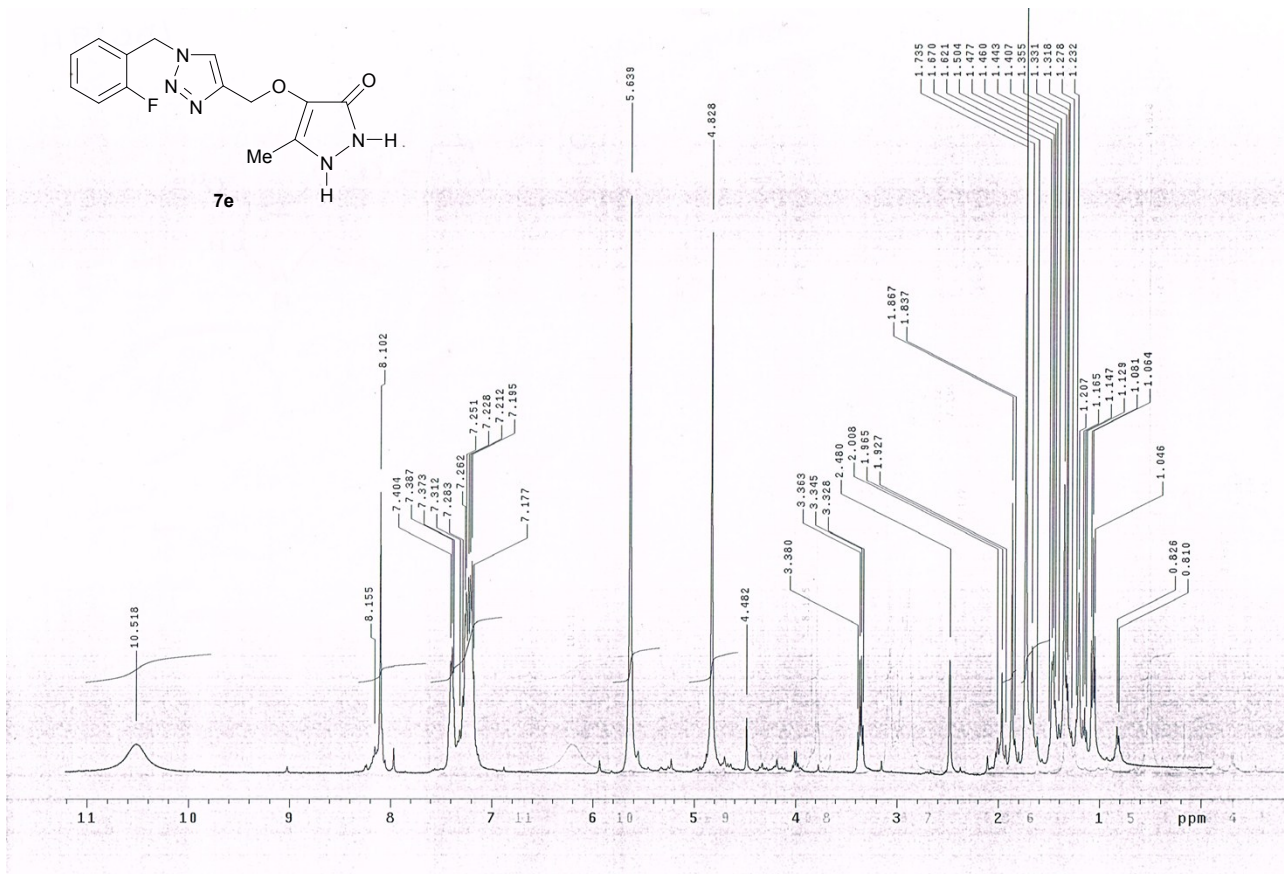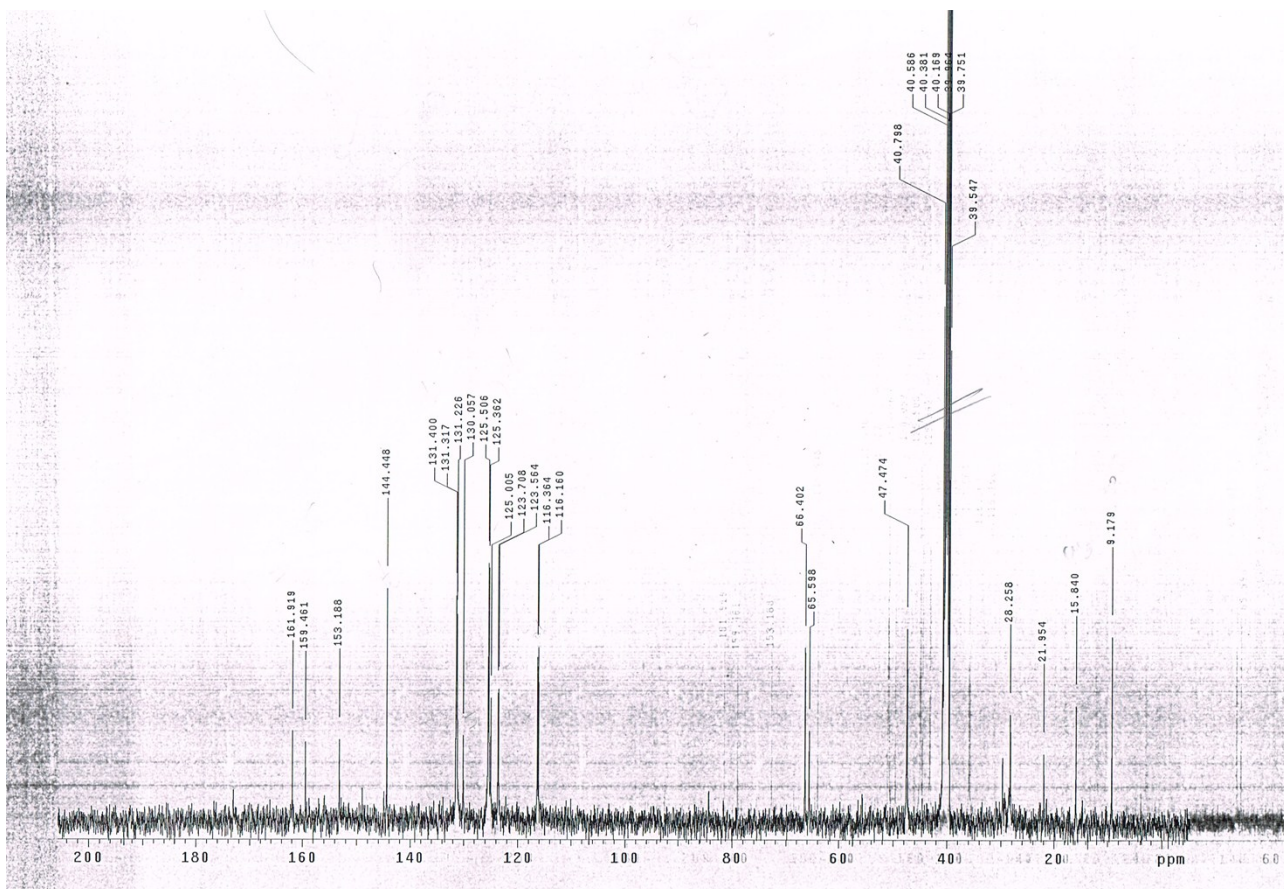

#### 4. References

(1) (a) O. A. Attanasi, P. Filippone, A. Mei, S. Santeusanio, *Synthesis* 1984, 671. (b) O. A. Attanasi, P. Filippone, A. Mei, S. Santeusanio, *Synthesis* 1984, 873. (c) L. Preti, O. A. Attanasi, E. Caselli, G. Favi, C. Ori, P. Davoli, F. Felluga, F. Prati, *Eur. J. Org. Chem.* 2010, 4312.
